# Supplementary material for: Cytotoxicity evaluation and DNA interaction of RuII-bipy complexes containing coumarin-based ligands
Source: Royal Society of Chemistry journal article supplement (doi:10.1039/d1dt01567b), 2021-01-01
Supplement: d1dt01567b1.pdf [file d1dt01567b1.pdf]

## Electronic Supplementary Information for

### **Cytotoxic evaluation and DNA interaction of Ru<sup>II</sup>-bipy complexes containing coumarin-based ligands**

Patrícia S. V. B. de Almeida<sup>a</sup>, Henrique Jefferson de Arruda<sup>a</sup>, Gleyton Leonel S. Sousa<sup>a</sup>, Felipe Vitório Ribeiro<sup>a</sup>, José Aleixo de Azevedo-França<sup>b</sup>, Larissa A. Ferreira<sup>a</sup>, Guilherme P. Guedes<sup>c</sup>, Heveline Silva<sup>d</sup>, Arthur E. Kummerle<sup>a</sup> and Amanda P. Neves<sup>a\*</sup>

<sup>a</sup>Instituto de Química, Universidade Federal Rural do Rio de Janeiro, BR 465 Km 7, 23890-000, Seropédica, RJ, Brazil. E-mail: amandanevess@ufrj.br

<sup>b</sup>Instituto de Ciências Exatas, Departamento de Química, Universidade Federal de Juiz de Fora, MG, Brazil.

<sup>c</sup>Instituto de Química, Universidade Federal Fluminense, Niterói, RJ, Brazil.

<sup>d</sup>Instituto de Ciências Exatas, Departamento de Química, Universidade Federal de Minas Gerais, MG, Brazil.

## SUMMARY

|                                                                                                                                                            |    |
|------------------------------------------------------------------------------------------------------------------------------------------------------------|----|
| I. Ethyl 3-(6-methyl-2-oxo-2 <i>H</i> -chromen-3-yl)-3-oxopropanoate (HL1).....                                                                            | 3  |
| II. Ethyl 3-(7-(diethylamino)-2-oxo-2 <i>H</i> -chromen-3-yl)-3-oxopropanoate (HL2) .....                                                                  | 6  |
| III. Ethyl 3-(8-methoxy-2-oxo-2 <i>H</i> -chromen-3-yl)-3-oxopropanoate (HL3).....                                                                         | 7  |
| IV. <i>cis</i> -bis(2,2'-bipyridyl)-[3-(6-(methyl)-2-oxo-2 <i>H</i> -chromen-3-yl)-3-oxoethylpropanoate]-ruthenium (II) hexafluorophosphate (1).....       | 11 |
| V. <i>cis</i> -bis(2,2'-bipyridyl)-[3-(7-(diethylamino)-2-oxo-2 <i>H</i> -chromen-3-yl)-3-oxoethylpropanoate] ruthenium (II) hexafluorophosphate (2) ..... | 14 |
| VI. <i>cis</i> -bis(2,2'-bipyridyl)-[3-(8-(methoxy)-2-oxo-2 <i>H</i> -chromen-3-yl)-3-oxoethylpropanoate] ruthenium (II) hexafluorophosphate (3) .....     | 16 |
| VII. X-Ray diffraction analysis.....                                                                                                                       | 20 |
| VIII. Biological studies .....                                                                                                                             | 21 |

# I. Ethyl 3-(6-methyl-2-oxo-2H-chromen-3-yl)-3-oxopropanoate (HL1)

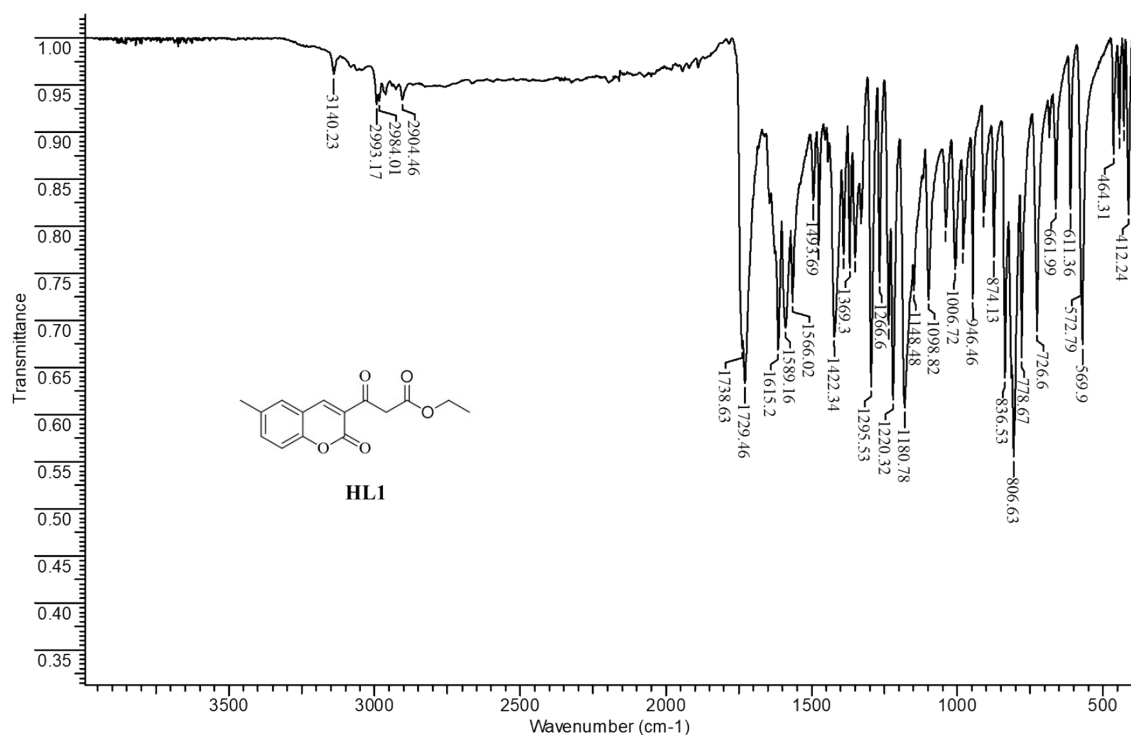

Figure S1: IR spectrum of HL1.

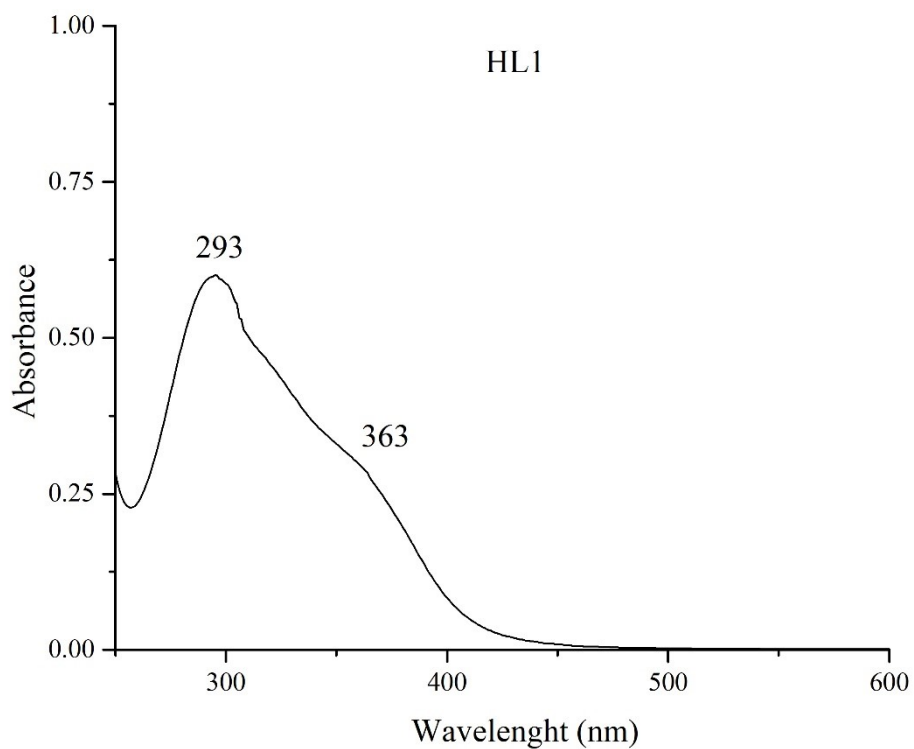

Figure S2: UV-Vis spectrum of HL1 in phosphate buffer at  $5 \times 10^{-5}$  M.

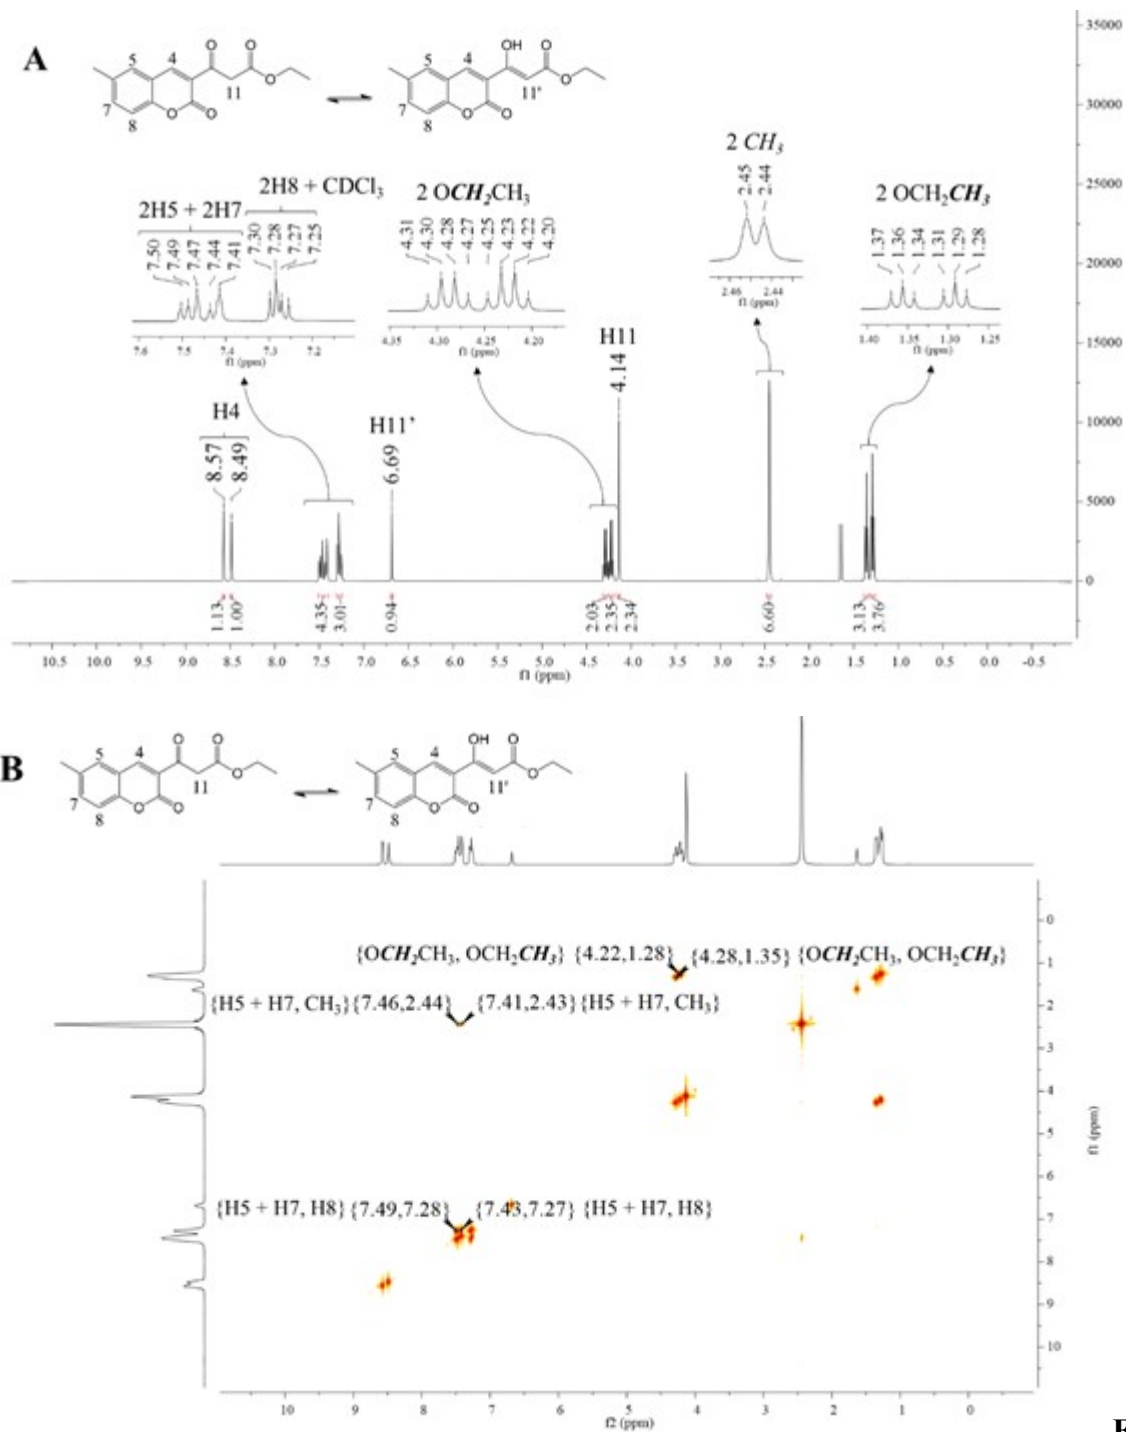

**Figure S3:**  $^1\text{H}$  NMR spectrum of HL1 (A) and COSY spectrum (B). Solvent: CDCl<sub>3</sub>.

20 #25-45 RT: 0.18-0.31 AV: 11 SM: 7G NL: 1.55E8  
T: FTMS + p ESI Full ms [60.0000-800.0000]

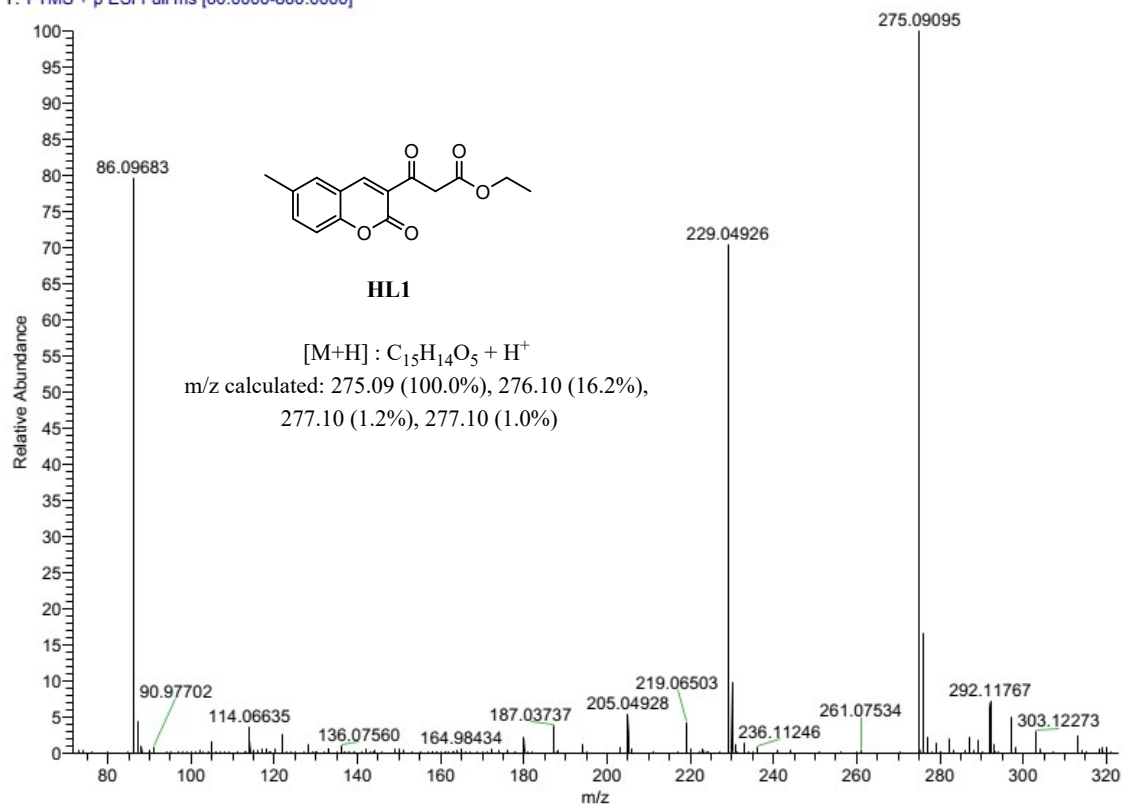

**Figure S4:** MS/ESI mass spectrum of **HL1**.

## II. Ethyl 3-(7-(diethylamino)-2-oxo-2H-chromen-3-yl)-3-oxopropanoate (**HL2**)

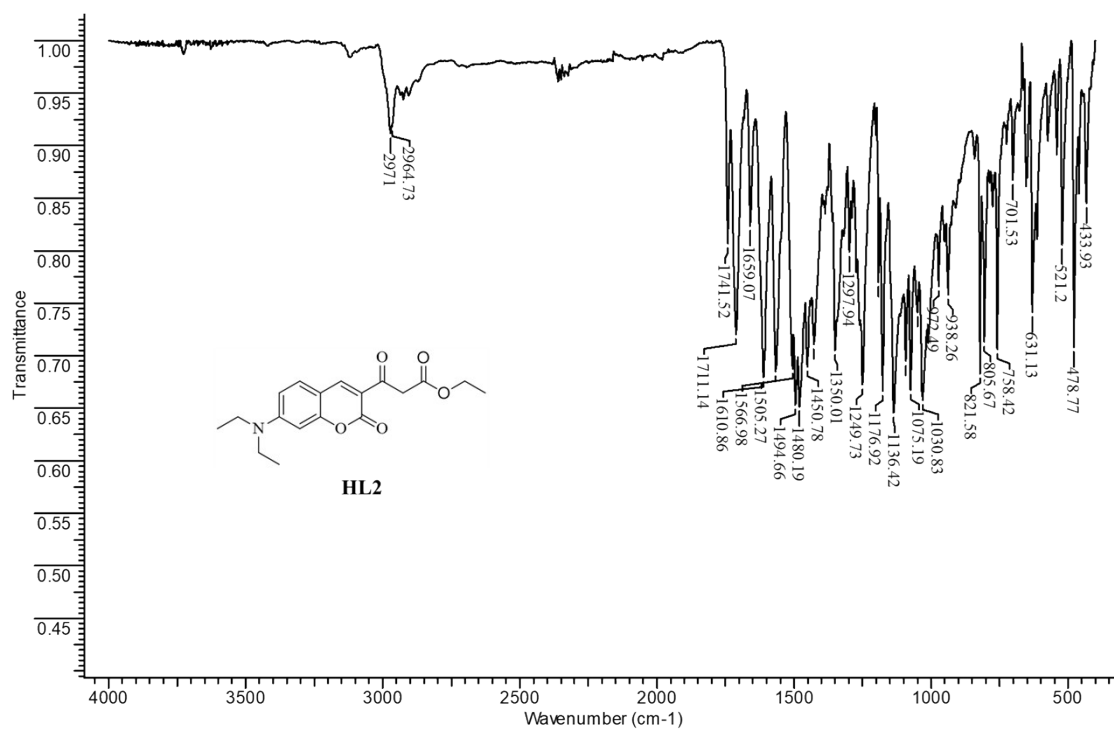

**Figure S5:** IR spectrum of **HL2**.

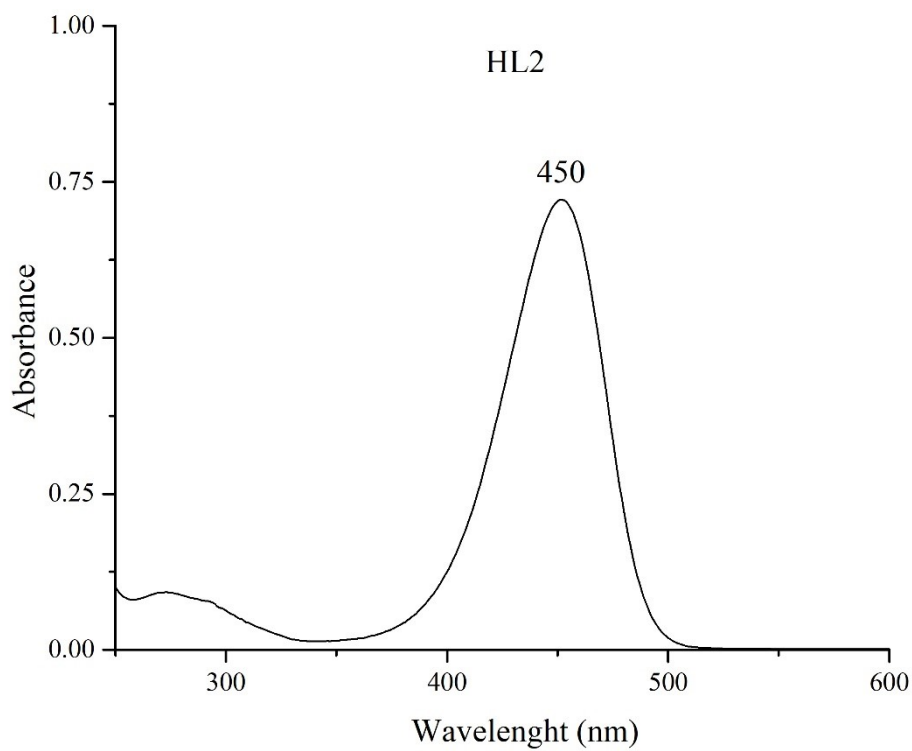

**Figure S6:** UV-Vis spectrum of **HL2** in phosphate buffer at  $2 \times 10^{-5}$  M.

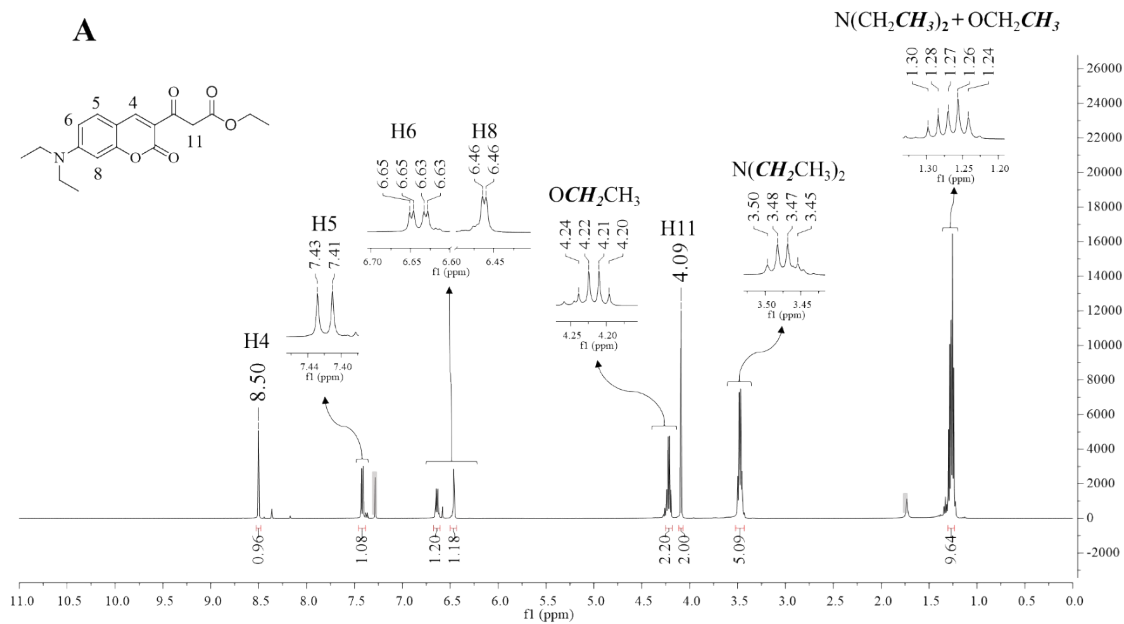

19 #26-41 RT: 0.19-0.29 AV: 8 SM: 7G NL: 4.75E8  
T: FTMS + p ESI Full ms [60.0000-800.0000]

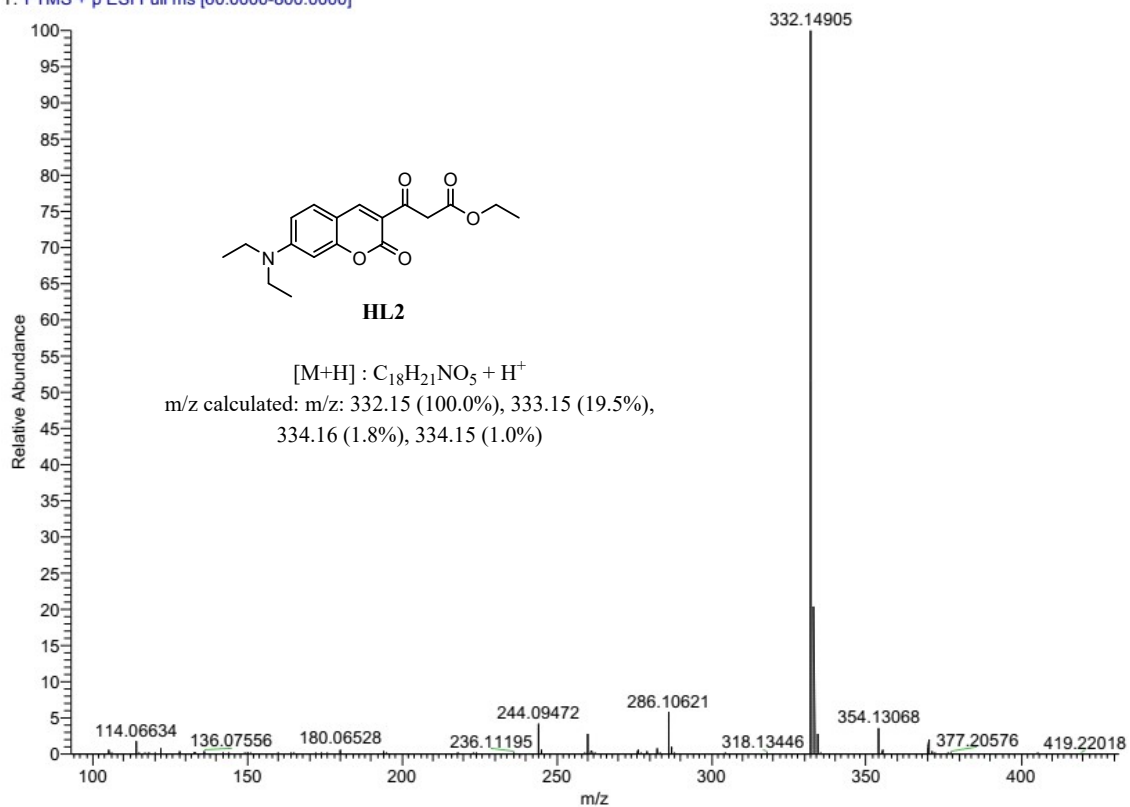

### III. Ethyl 3-(8-methoxy-2-oxo-2*H*-chromen-3-yl)-3-oxopropanoate (**HL3**)

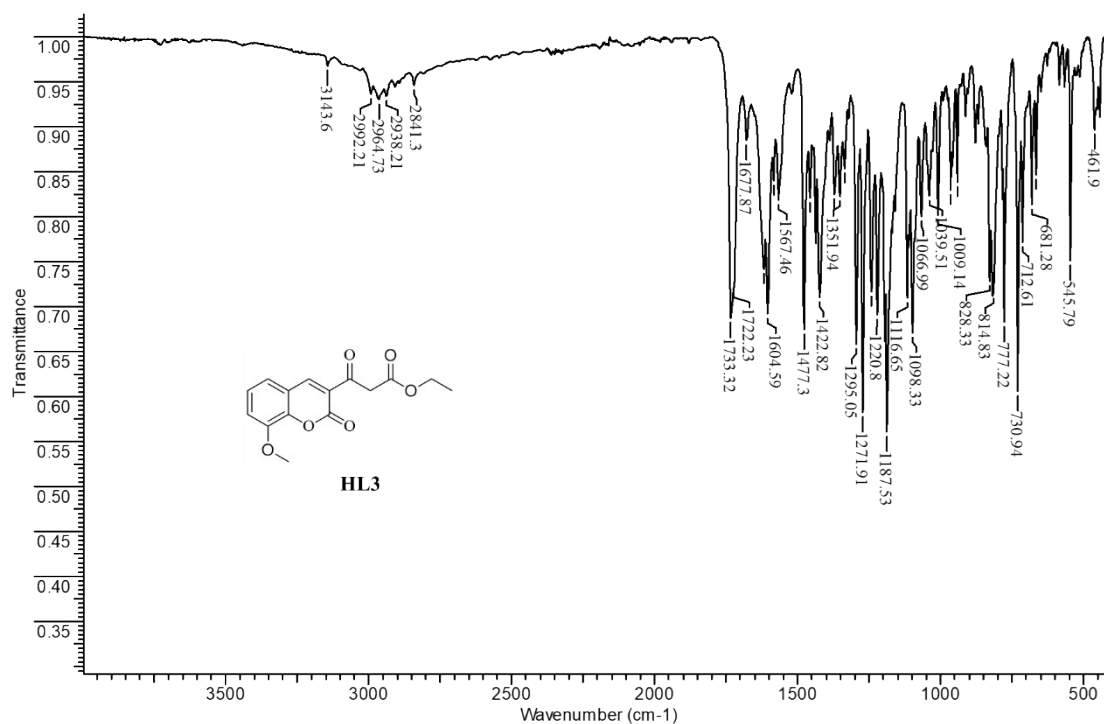

Figure S9: IR spectrum of **HL3**.

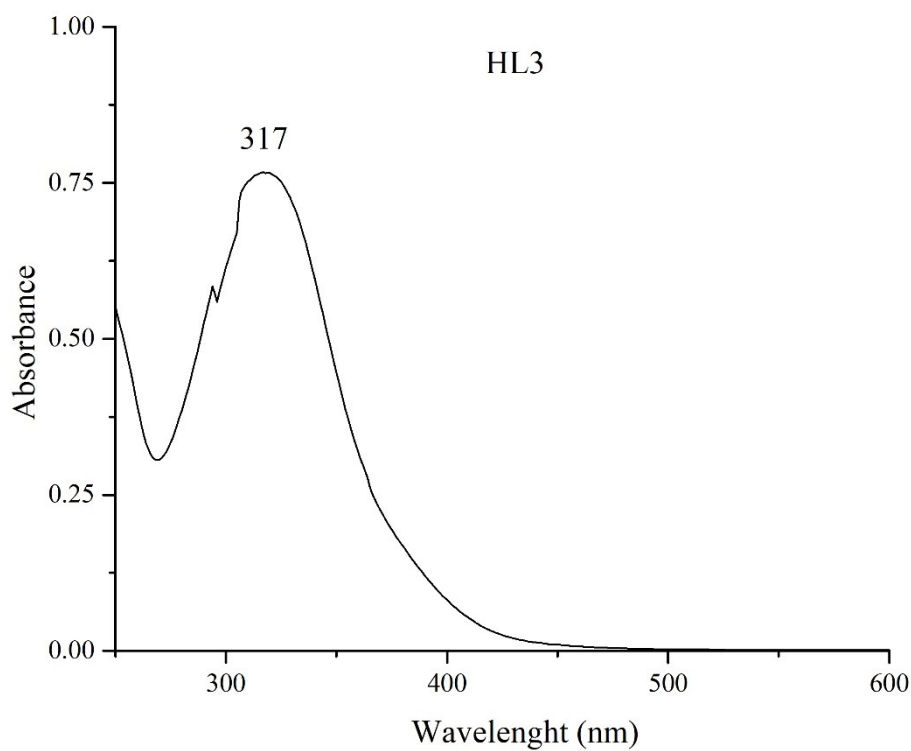

Figure S10: UV-Vis spectrum of **HL3** in phosphate buffer at  $6 \times 10^{-5}$  M.



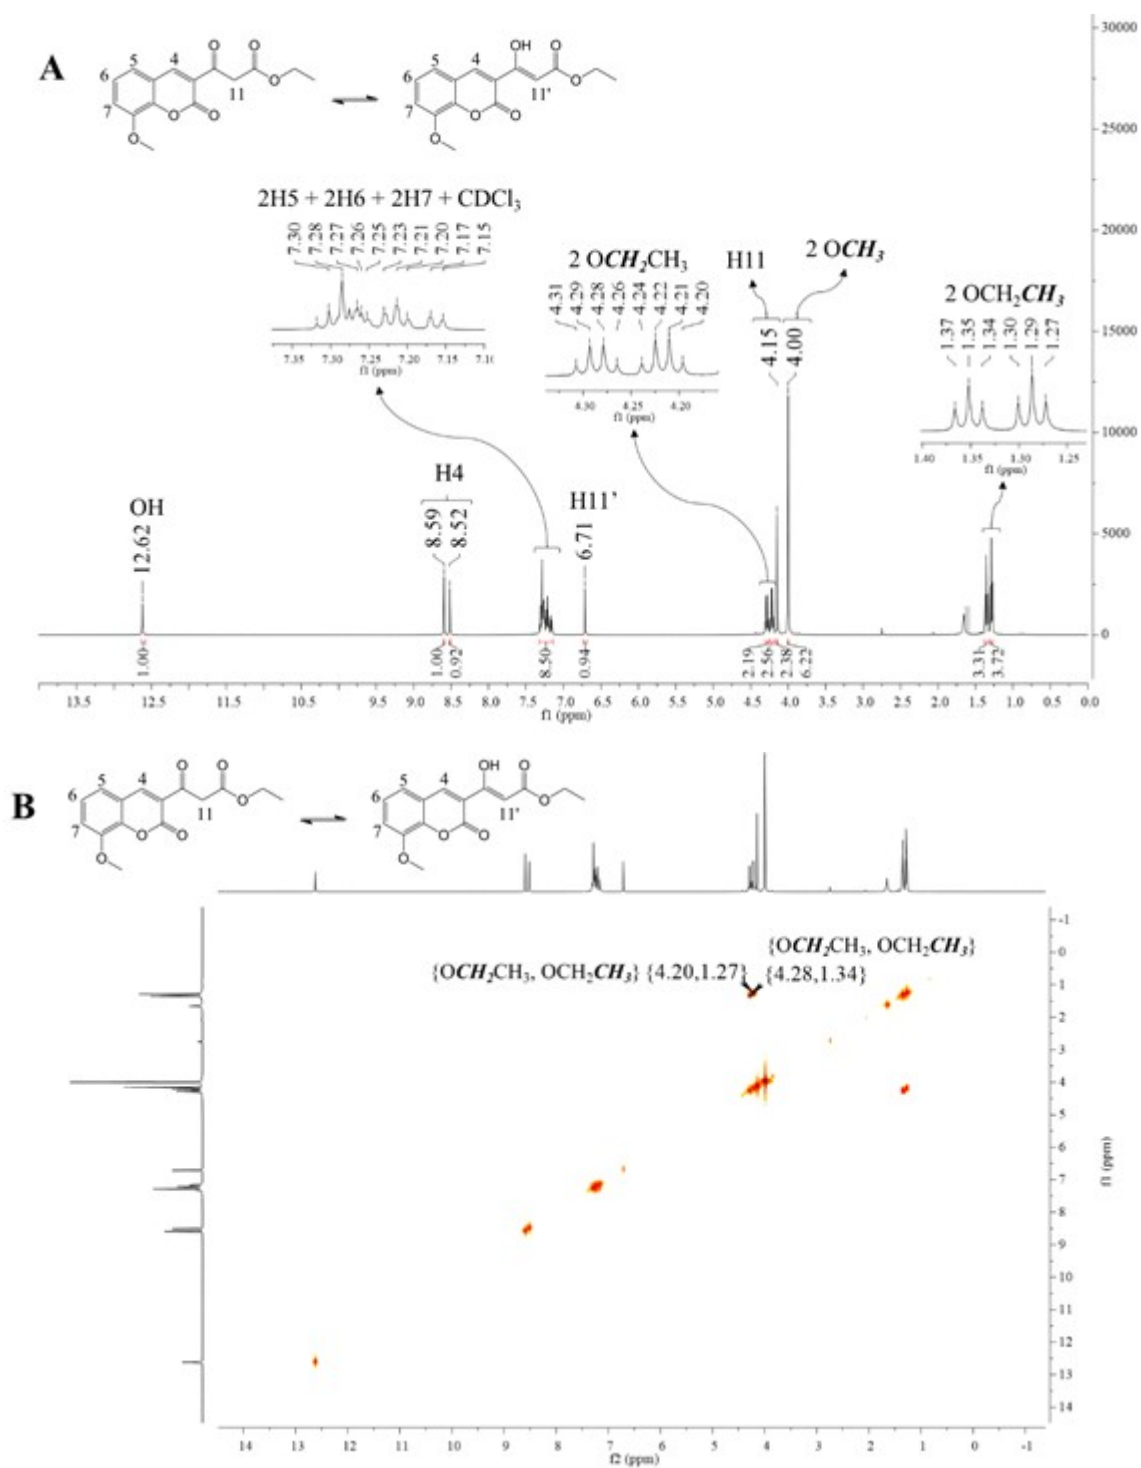

**Figure S11:**  $^1\text{H}$  NMR spectrum of **HL3** (A) and COSY spectrum (B). Solvent:  $\text{CDCl}_3$ .

21 #26-39 RT: 0.19-0.27 AV: 7 SM: 7G NL: 3.44E8  
T: FTMS + p ESI Full ms [60.0000-800.0000]

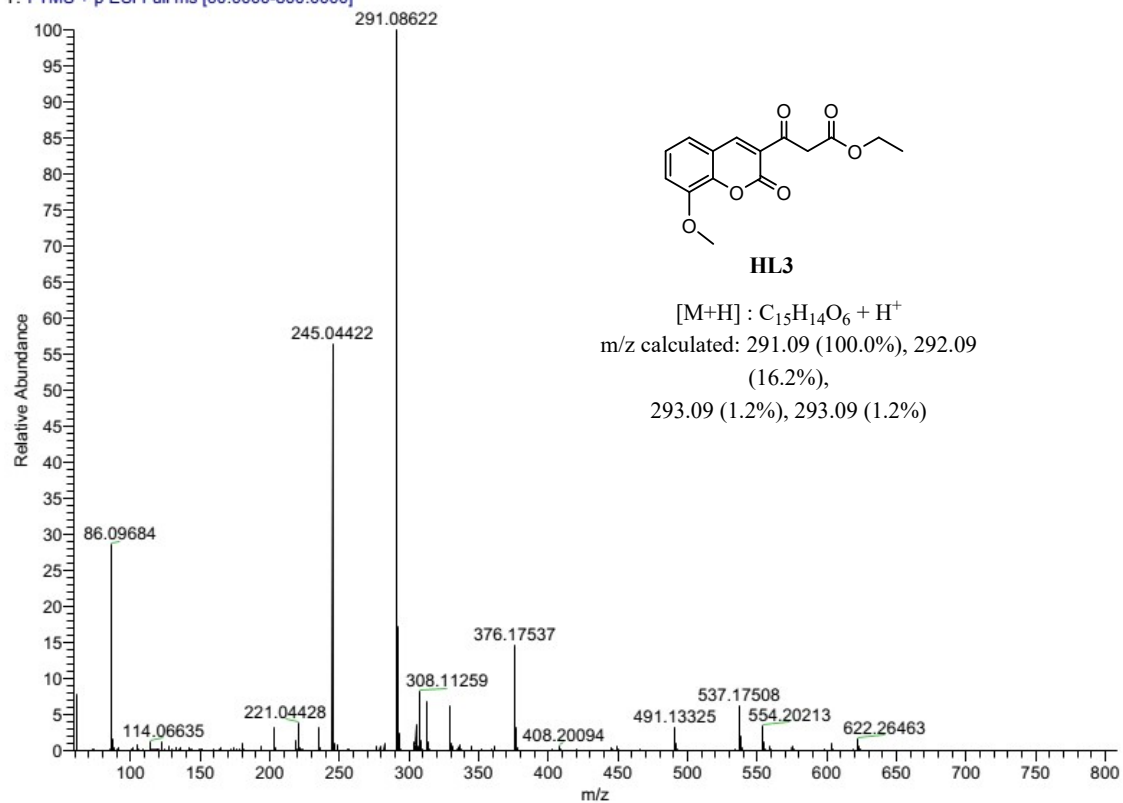

**Figure S12:** MS/ESI mass spectrum of **HL3**.

**IV. *cis*-bis(2,2'-bipyridyl)-[3-(6-(methyl)-2-oxo-2*H*-chromen-3-yl)-3-oxoethylpropanoate]-ruthenium (II) hexafluorophosphate (**1**)**

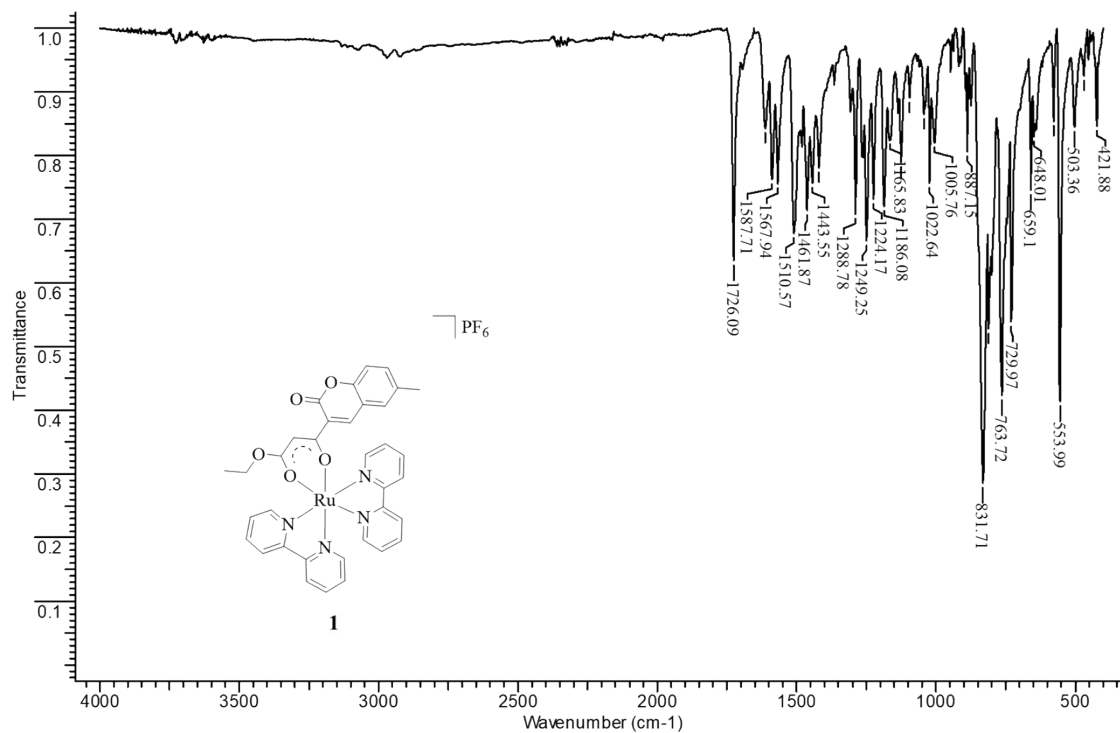

**Figure S13:** IR spectrum of **1**.

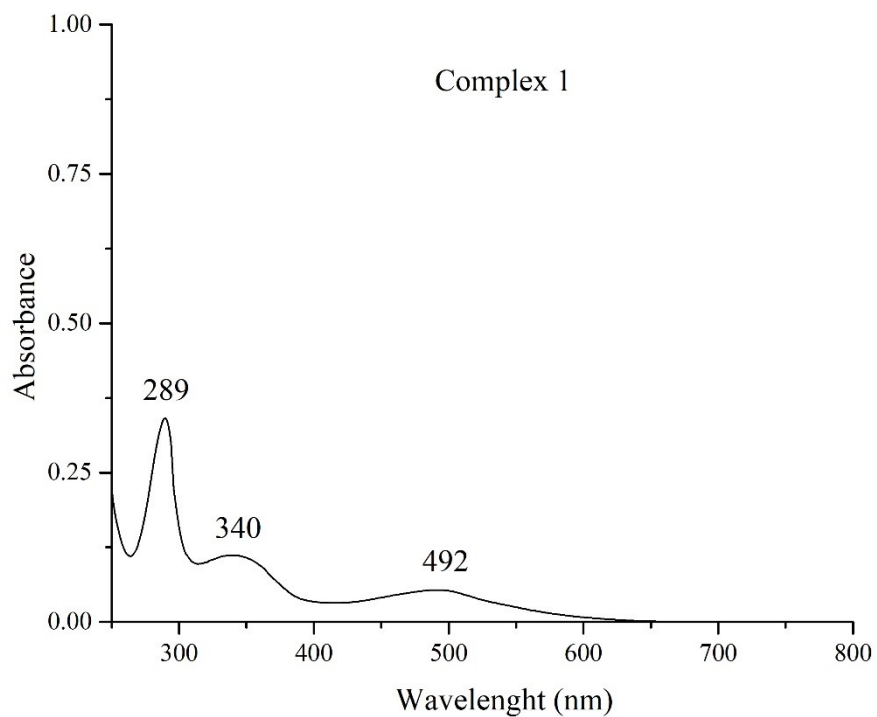

**Figure S14:** UV-Vis spectrum of **1** in phosphate buffer at  $9 \times 10^{-6}$  M.

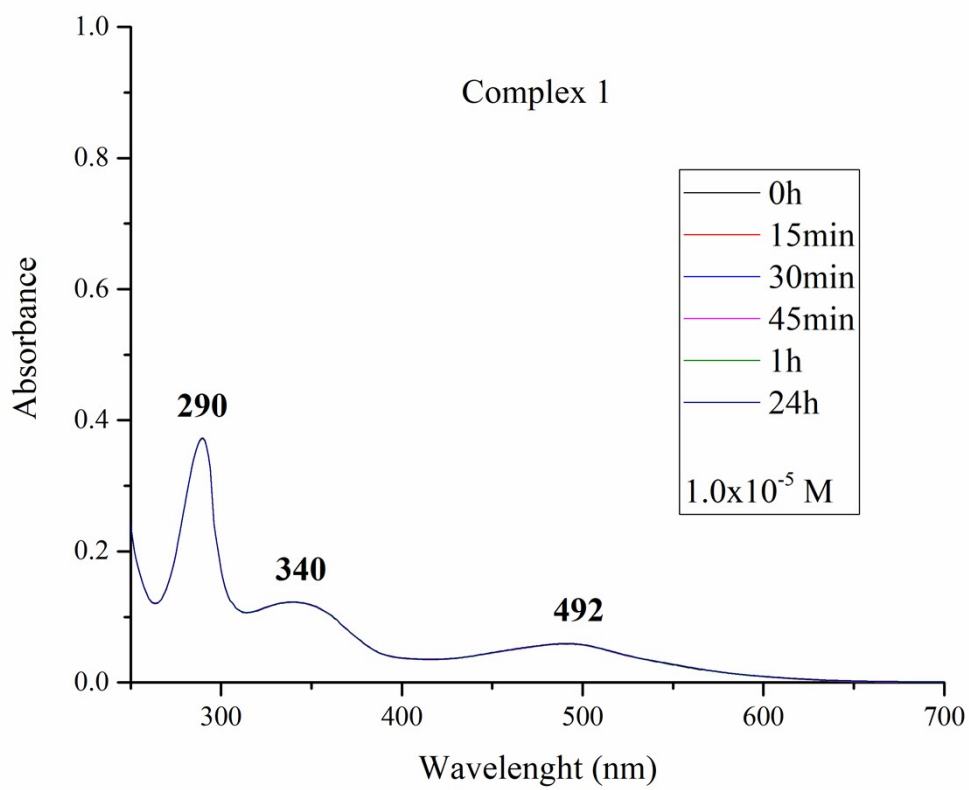

**Figure S15:** UV-Vis spectrum of **1** recorded over time within 24h, in phosphate buffer at  $1.0 \times 10^{-5}$  M.

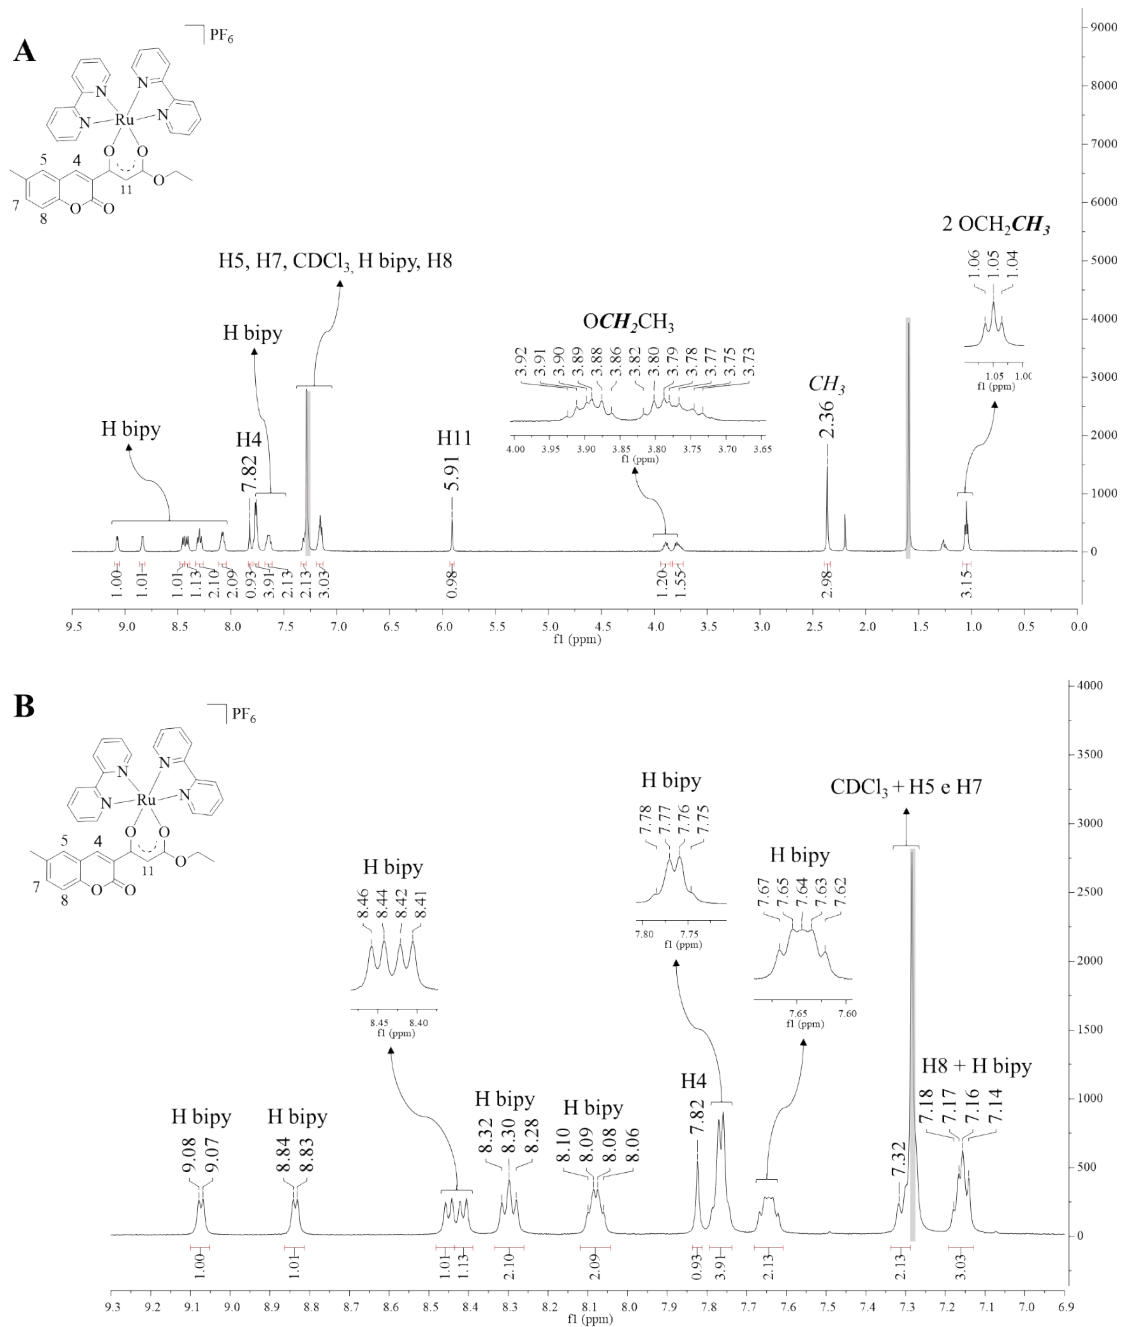

**Figure S16:**  $^1\text{H}$  NMR spectra of **1** (A). Expanded region from 6.9 to 9.3 ppm (B). Solvent:  $\text{CDCl}_3$ .

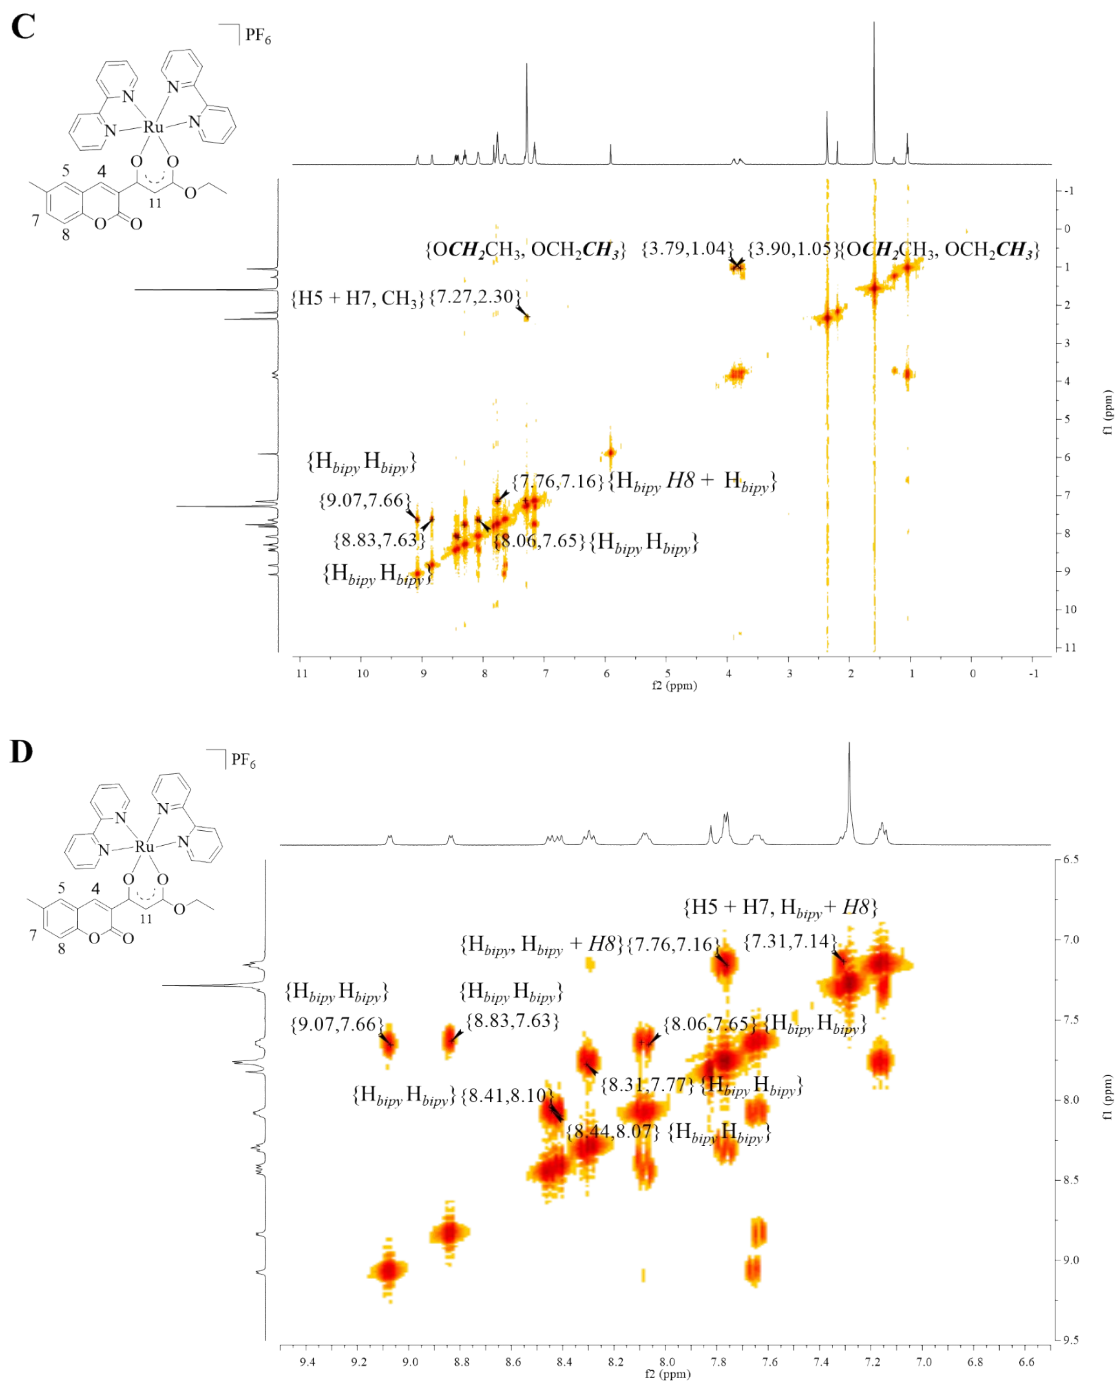

**Figure S17:** COSY spectra of **1** (C). Expanded region from 6.5 to 9.5 ppm (D). Solvent:  $\text{CDCl}_3$ .

V. *cis*-bis(2,2'-bipyridyl)-[3-(7-(diethylamino)-2-oxo-2*H*-chromen-3-yl)-3-oxoethylpropanoate] ruthenium (II) hexafluorophosphate (**2**)

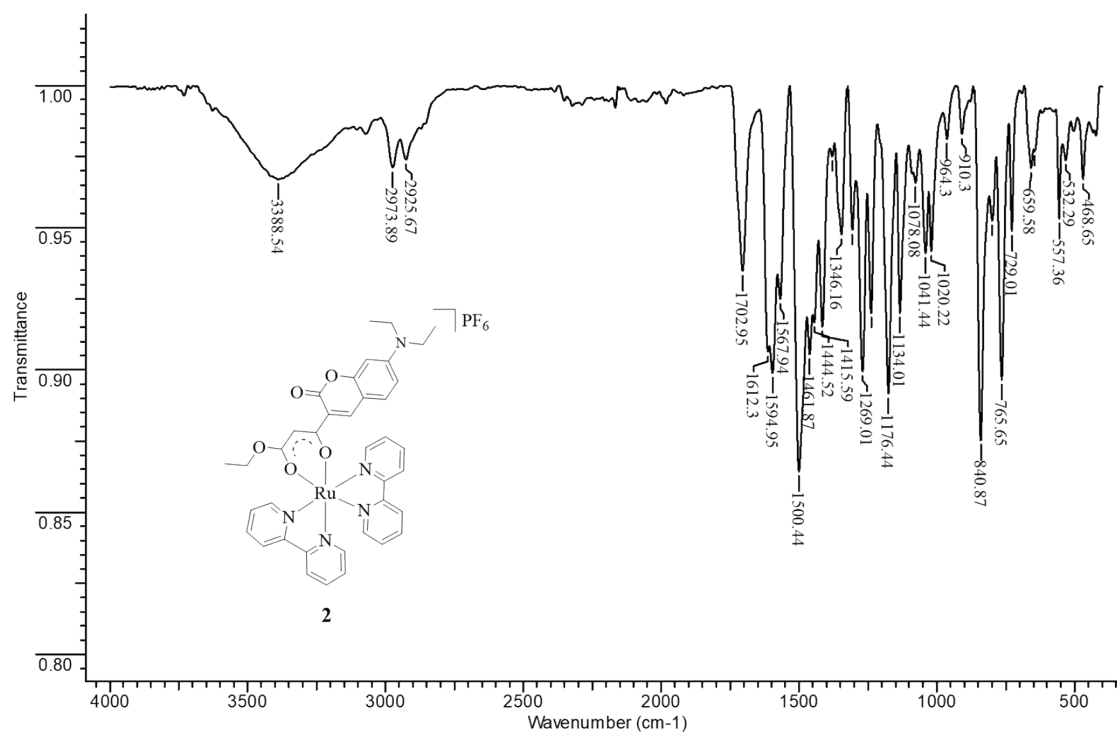

Figure S18: IR spectrum of **2**.

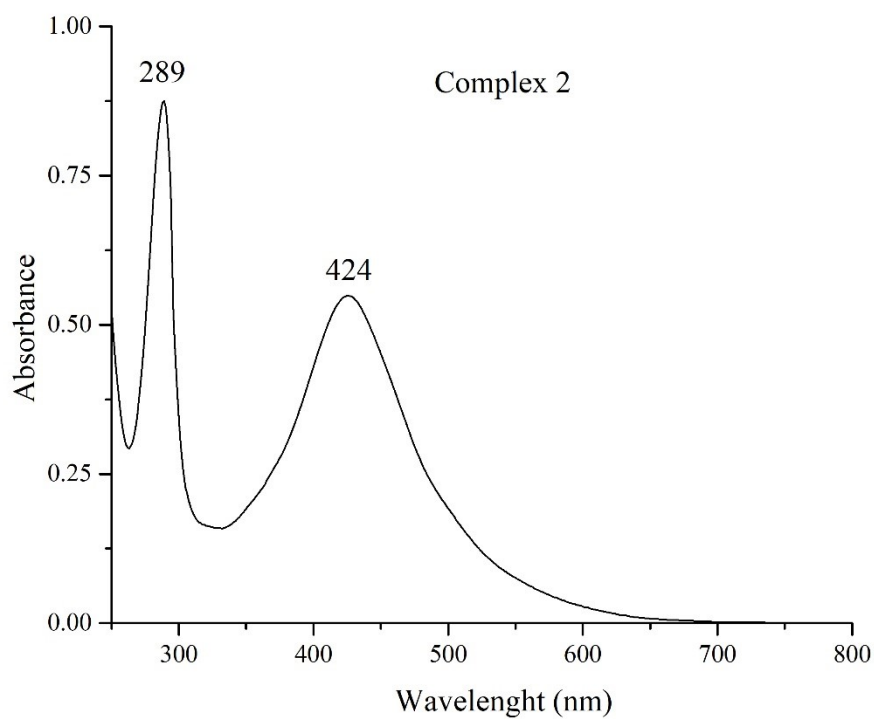

Figure S19: UV-Vis spectrum of the complex **2** in phosphate buffer at  $2 \times 10^{-5}$  M.

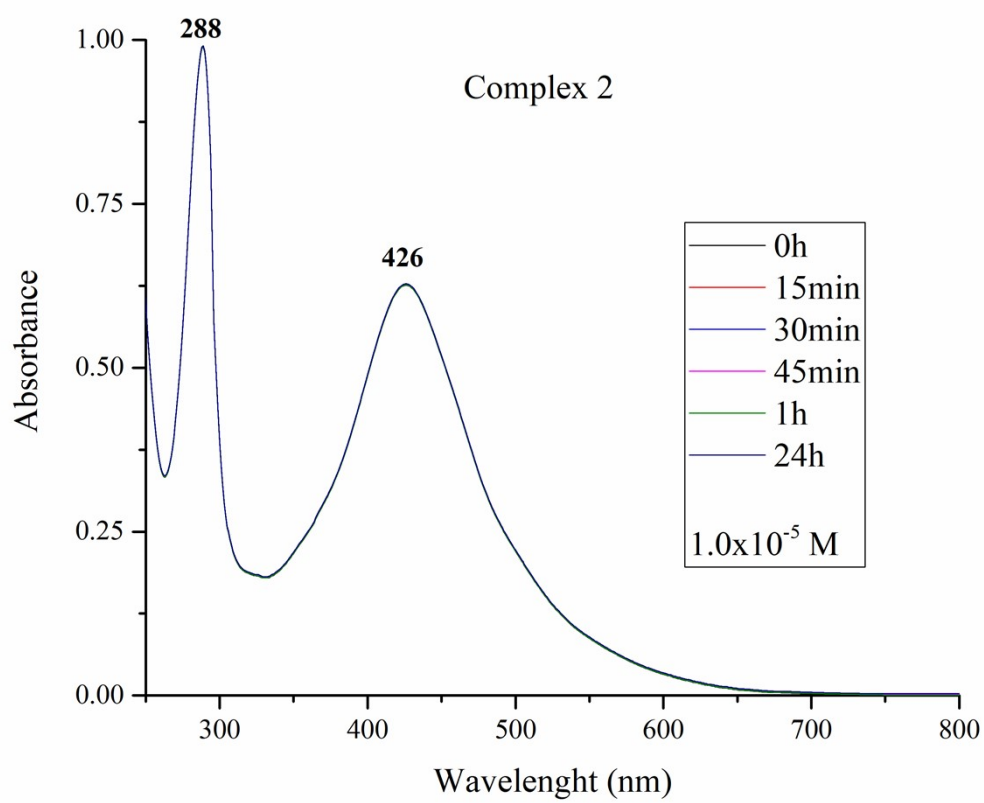

**Figure S20:** UV-Vis spectrum of **2** recorded over time within 24h, in phosphate buffer at  $1.0 \times 10^{-5} \text{ M}$ .



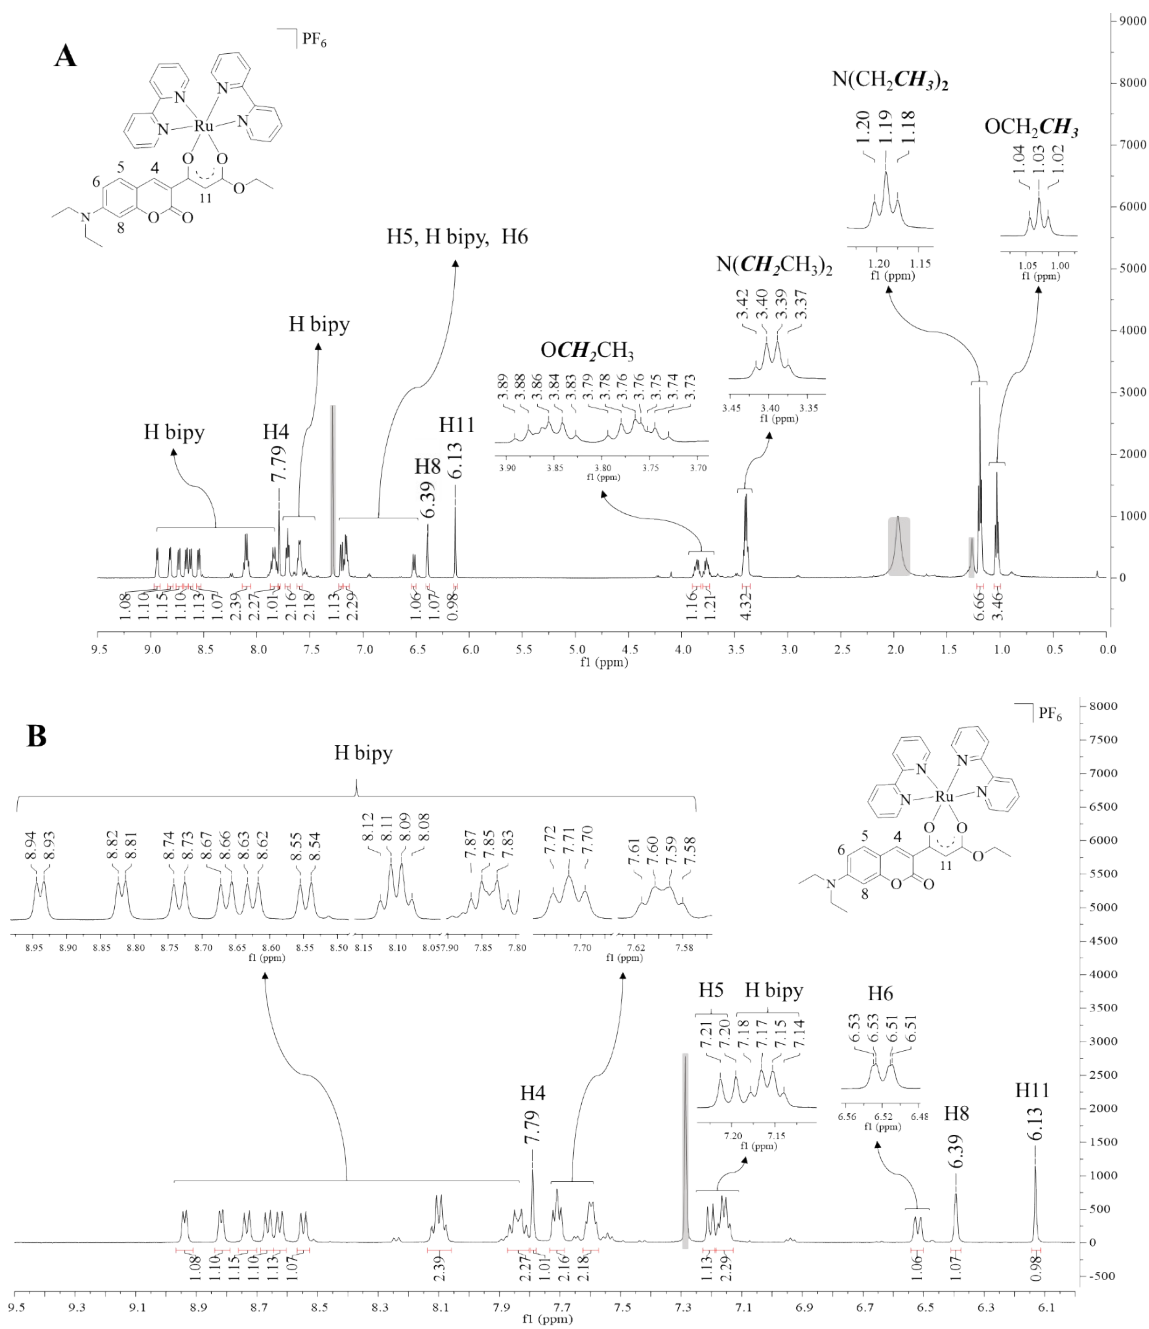

**Figure S21:**  $^1\text{H}$  NMR spectra of **1** (A). Expanded region from 6.0 to 9.5 ppm (B). Solvent:  $\text{CDCl}_3$

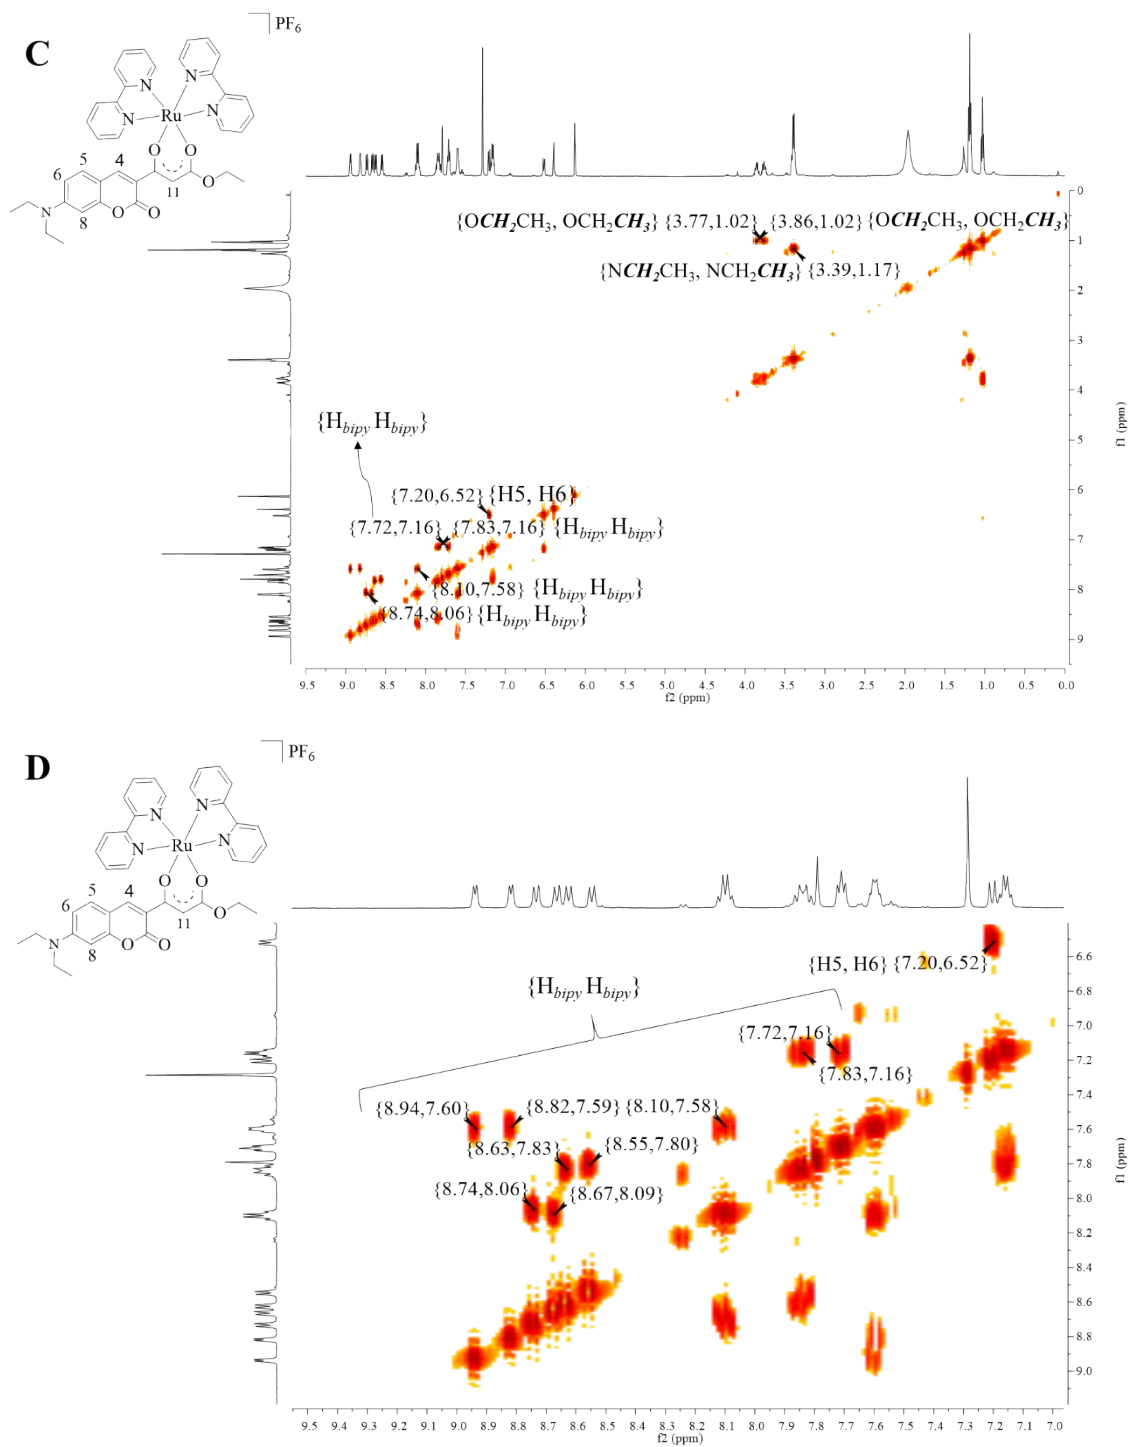

**Figure S22:** COSY spectra of **2** (C). Expanded region from 6.5 to 9.5 ppm (D). Solvent:  $CDCl_3$ .

VI. *cis*-bis(2,2'-bipyridyl)-[3-(8-(methoxy)-2-oxo-2*H*-chromen-3-yl)-3-oxoethylpropanoate] ruthenium (II) hexafluorophosphate (**3**)

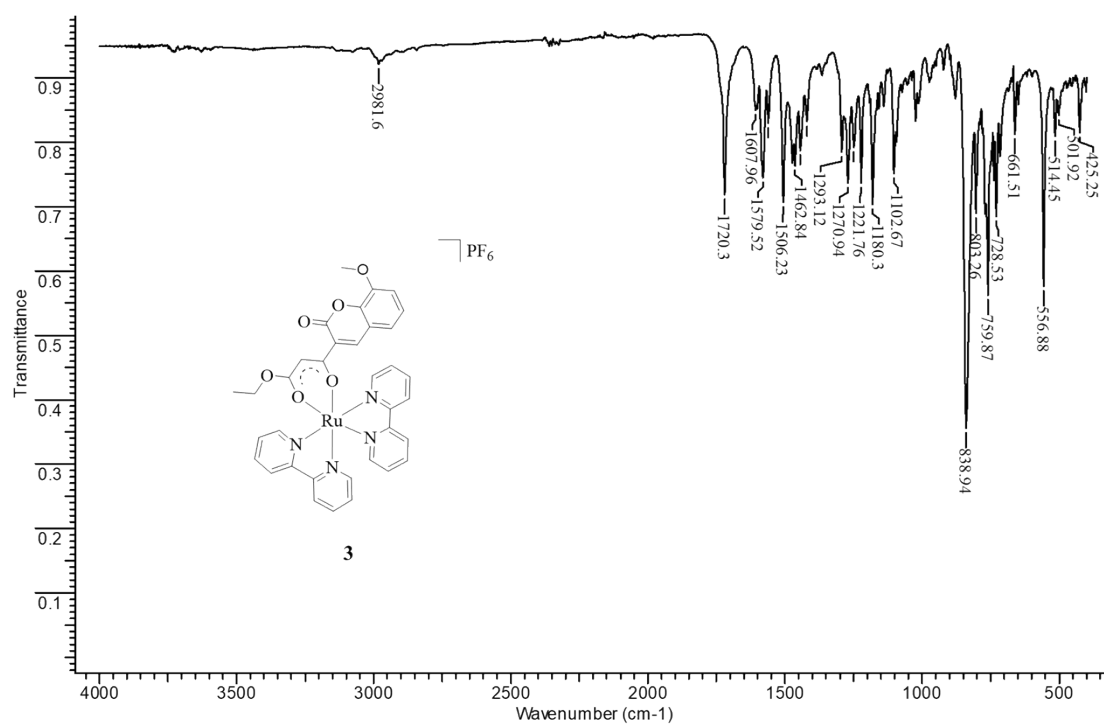

Figure S23: IR spectrum of **3**.

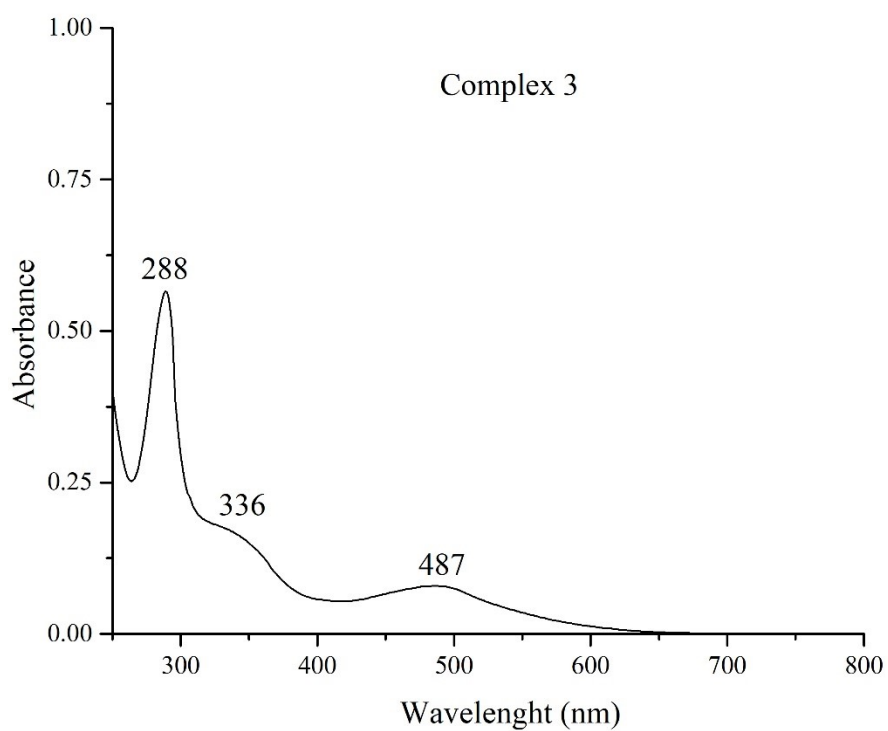

Figure S24: UV-Vis spectrum of **3** in phosphate buffer at  $1.5 \times 10^{-5}$  M.

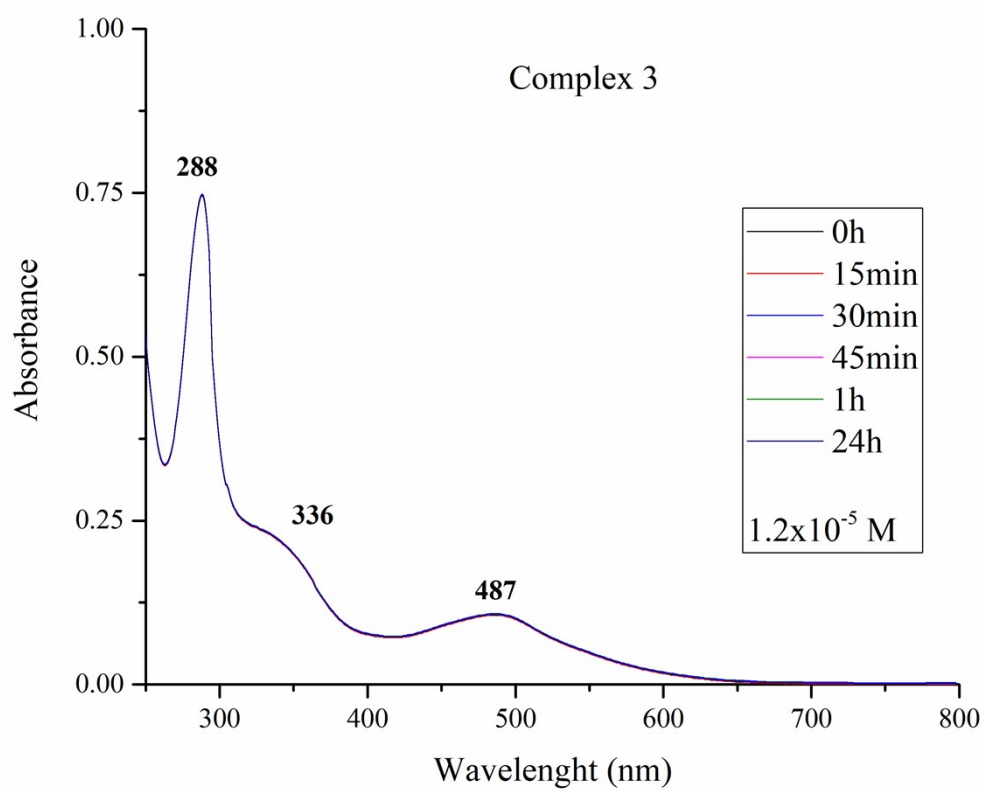

**Figure S25:** UV-Vis spectrum of **3** recorded over time within 24h, in phosphate buffer at  $1.2 \times 10^{-5}$  M.

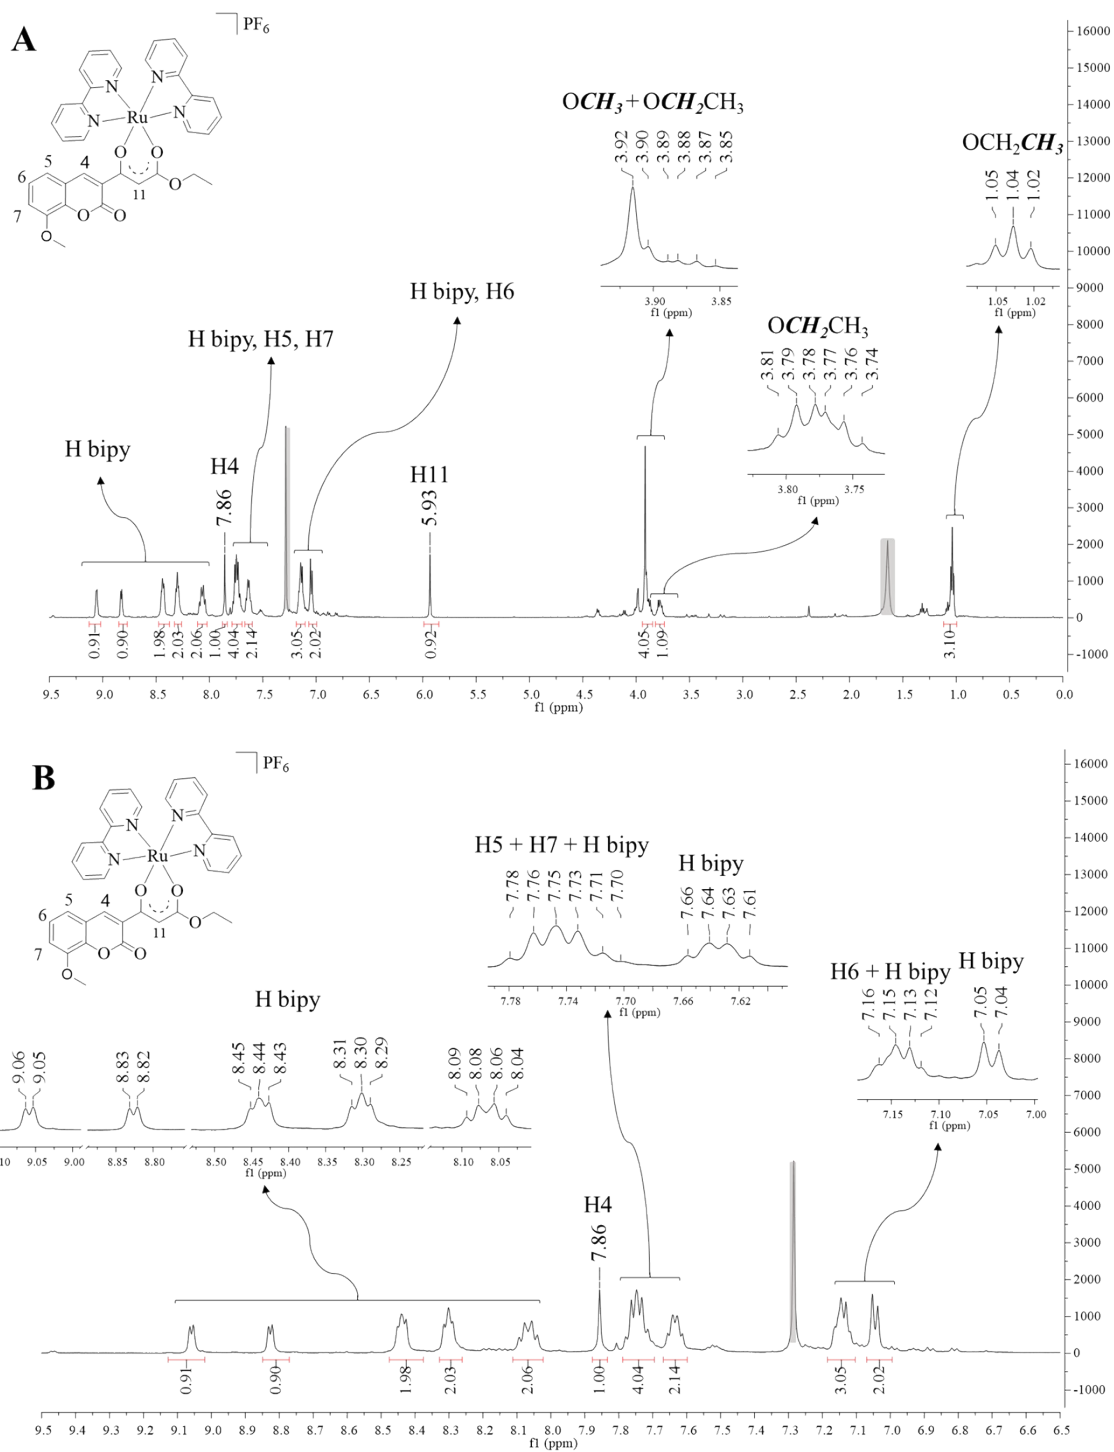

**Figure S26:**  $^1\text{H}$  NMR spectra of **3** (A). Expanded region from 6.5 to 9.5 ppm (B). Solvent:  $\text{CDCl}_3$

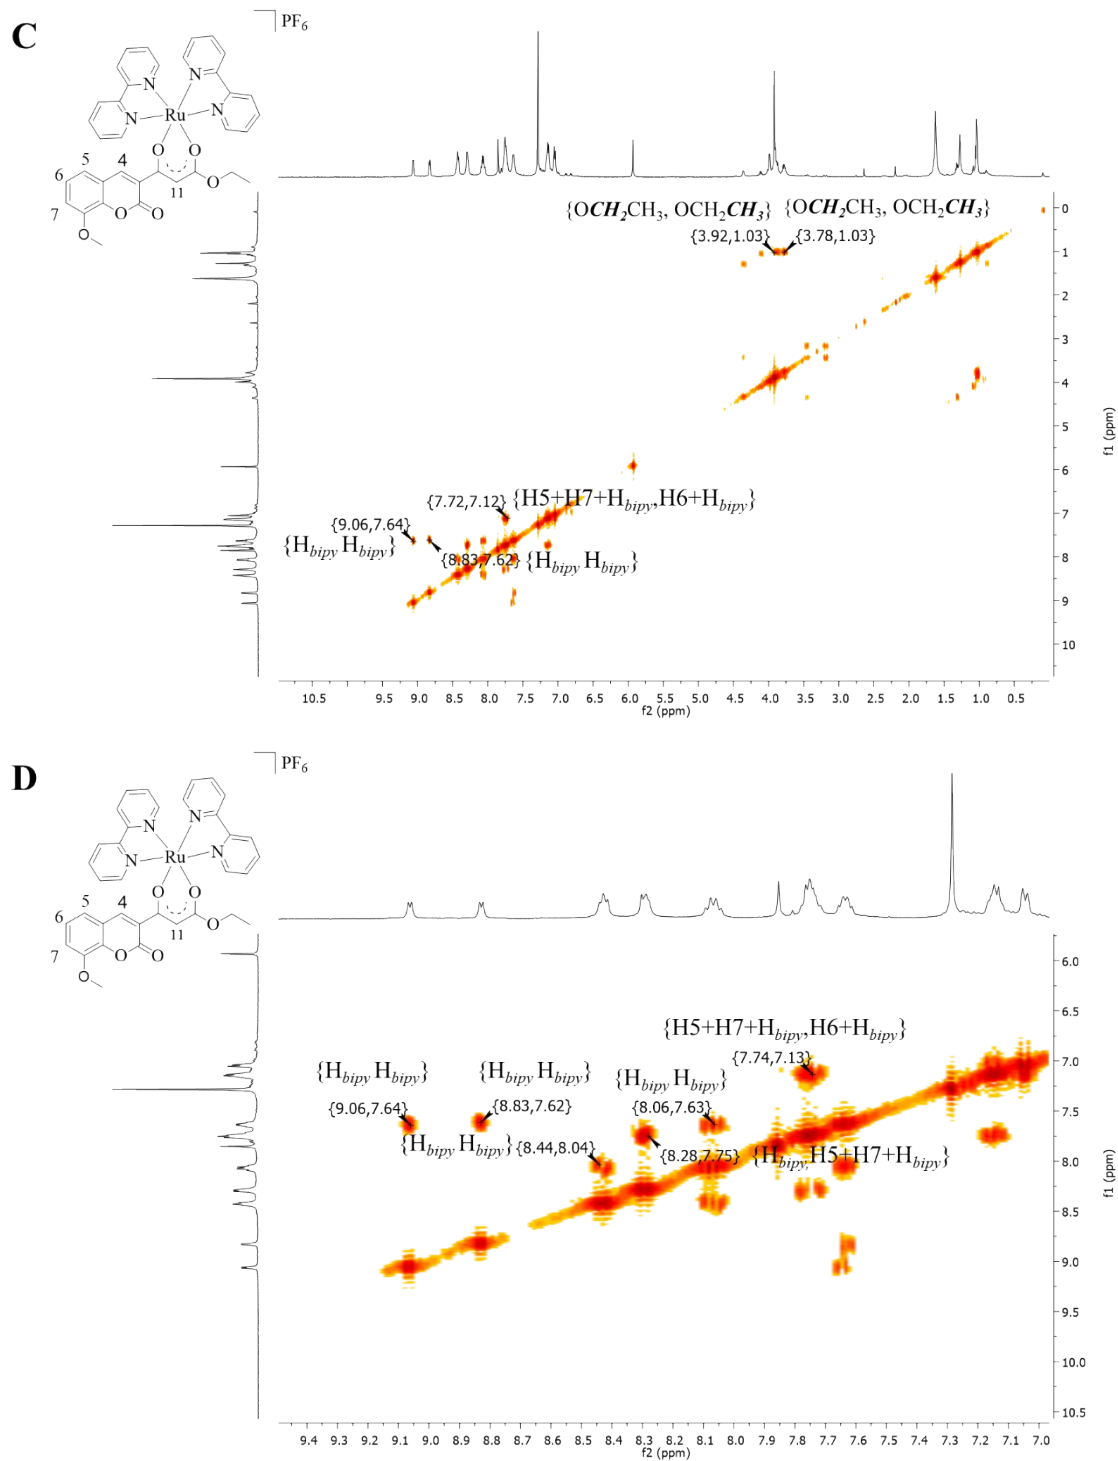

**Figure S27:** COSY spectra of **3** (**C**). Expanded region from 7.0 to 9.5 ppm (**D**). Solvent: CDCl<sub>3</sub>.

## VII. X-Ray diffraction analysis

**Table S1:** Summary of crystal structure, data collection and refinement for complex **2**.

|                                                                                |                                                                                  |
|--------------------------------------------------------------------------------|----------------------------------------------------------------------------------|
| <b>Chemical formula</b>                                                        | C <sub>38</sub> H <sub>36</sub> F <sub>6</sub> N <sub>5</sub> O <sub>5</sub> PRu |
| <b>Formula weigh</b>                                                           | 888.76                                                                           |
| <b>Crystal system</b>                                                          | monoclinic                                                                       |
| <b>a/Å</b>                                                                     | 28.3360(12)                                                                      |
| <b>b/Å</b>                                                                     | 10.5670(3)                                                                       |
| <b>c/Å</b>                                                                     | 26.8770(9)                                                                       |
| <b>α/°</b>                                                                     | 90                                                                               |
| <b>β/°</b>                                                                     | 110.5490(10)                                                                     |
| <b>γ/°</b>                                                                     | 90                                                                               |
| <b>Unit cell volume (Å<sup>3</sup>)</b>                                        | 7535.6(5)                                                                        |
| <b>T (K)</b>                                                                   | 273(2)                                                                           |
| <b>Space group</b>                                                             | C 2/c                                                                            |
| <b>Formula units per cell, Z</b>                                               | 8                                                                                |
| <b>Radiation type</b>                                                          | MoKα                                                                             |
| <b>Absorption coefficient (mm<sup>-1</sup>)</b>                                | 0.539                                                                            |
| <b>Reflections measured</b>                                                    | 41132                                                                            |
| <b>Independents reflections</b>                                                | 6637                                                                             |
| <b><i>R</i><sub>int</sub></b>                                                  | 0.0521                                                                           |
| <b>Final <i>R</i><sub>I</sub> values (<i>I</i>&gt;2σ(<i>I</i>))</b>            | 0.0361                                                                           |
| <b>Final <i>wR</i>(<i>F</i><sup>2</sup>) values (<i>I</i>&gt;2σ(<i>I</i>))</b> | 0.0773                                                                           |
| <b>Final <i>R</i><sub>I</sub> values (all data)</b>                            | 0.0522                                                                           |
| <b>Final <i>wR</i>(<i>F</i><sup>2</sup>) values (all data)</b>                 | 0.0849                                                                           |
| <b>Goodness of (GOF) fit F<sup>2</sup></b>                                     | 1.046                                                                            |
| <b>CCDC deposition</b>                                                         | 2076893                                                                          |

**Table S2:** Hydrogen-bond geometry (Å, °) for **2**.

| <i>D</i> —H··· <i>A</i> | <i>D</i> —H | <i>H</i> ··· <i>A</i> | <i>D</i> ··· <i>A</i> | <i>D</i> —H··· <i>A</i> |
|-------------------------|-------------|-----------------------|-----------------------|-------------------------|
| C35—H35...F5i           | 0.93        | 2.99                  | 3.306(4)              | 101.4                   |
| C38—H38...O4            | 0.93        | 2.61                  | 3.149(4)              | 117.8                   |
| C28—H28...F4            | 0.93        | 2.51                  | 3.140(4)              | 125.5                   |

Symmetry code: (i) -x+1, -y+2, -z+1.

## VIII. Biological studies

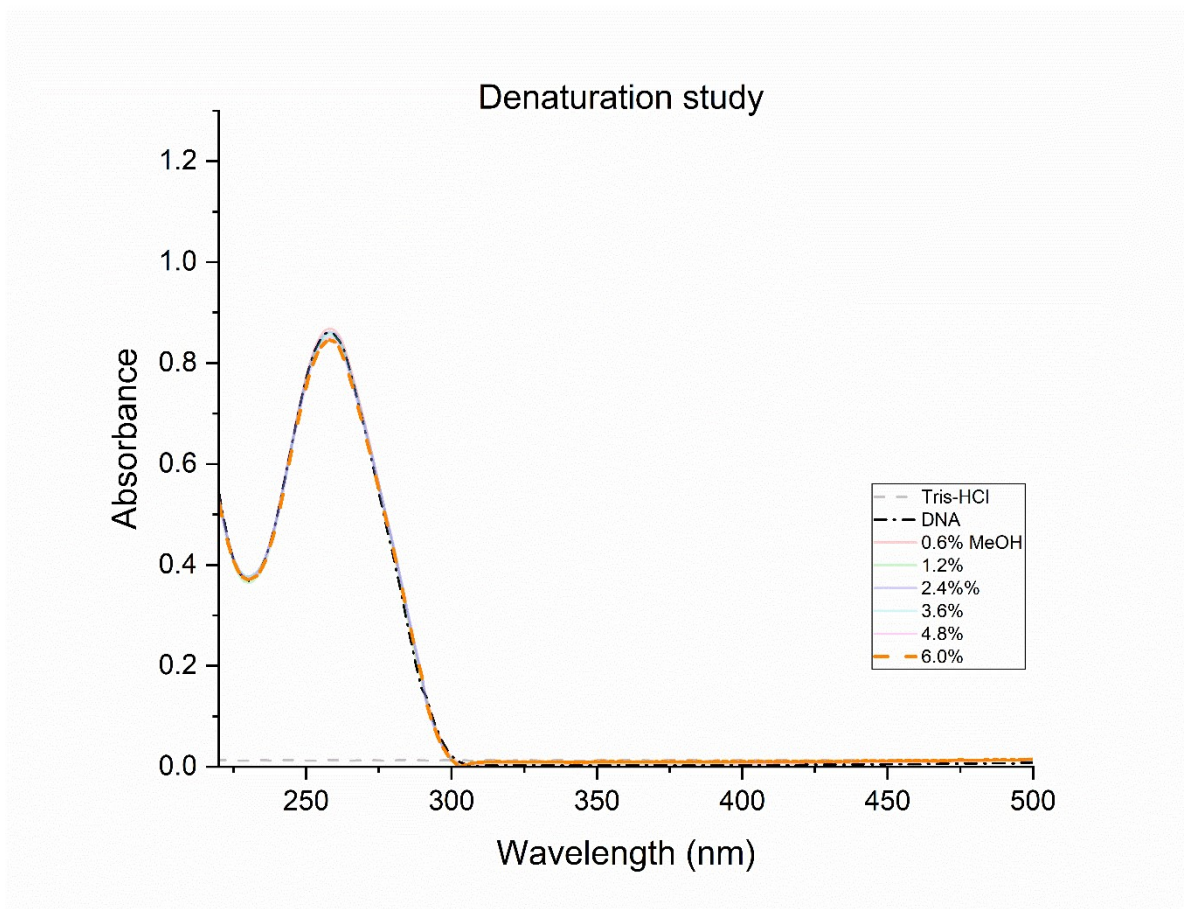

**Figure S28.** Absorption spectra of the ct-DNA in the presence of methanol in different proportions. Methanol = 0, 0.6, 1.2, 2.4, 3.6, 4.8 and 6.0%. ct-DNA at a concentration of 120  $\mu$  M in Tris-HCl buffer (pH 7.4).



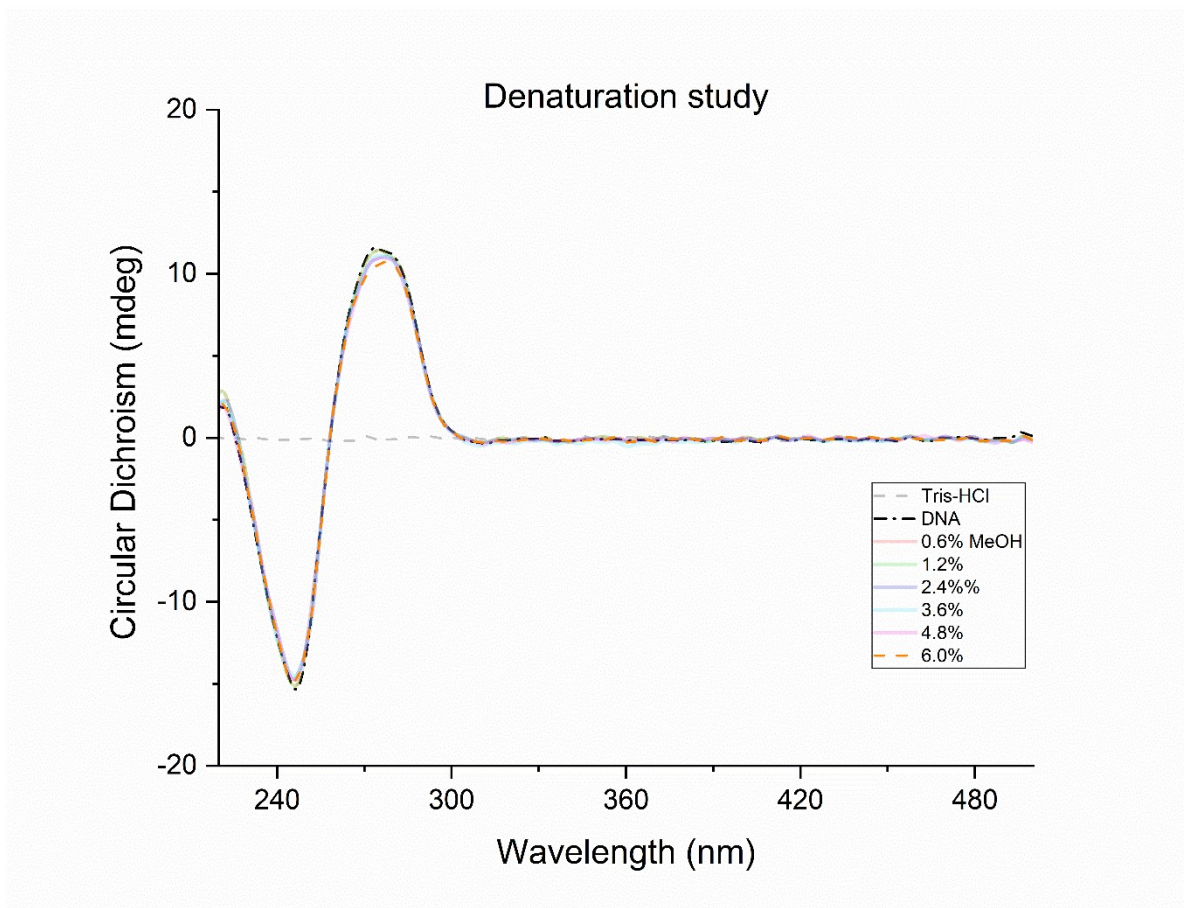

**Figure S29.** Circular dichroism of DNA at a concentration of 120  $\mu$ M in Tris-HCl buffer (pH 7.4), in the presence of increasing methanol proportions (0 to 6 %).

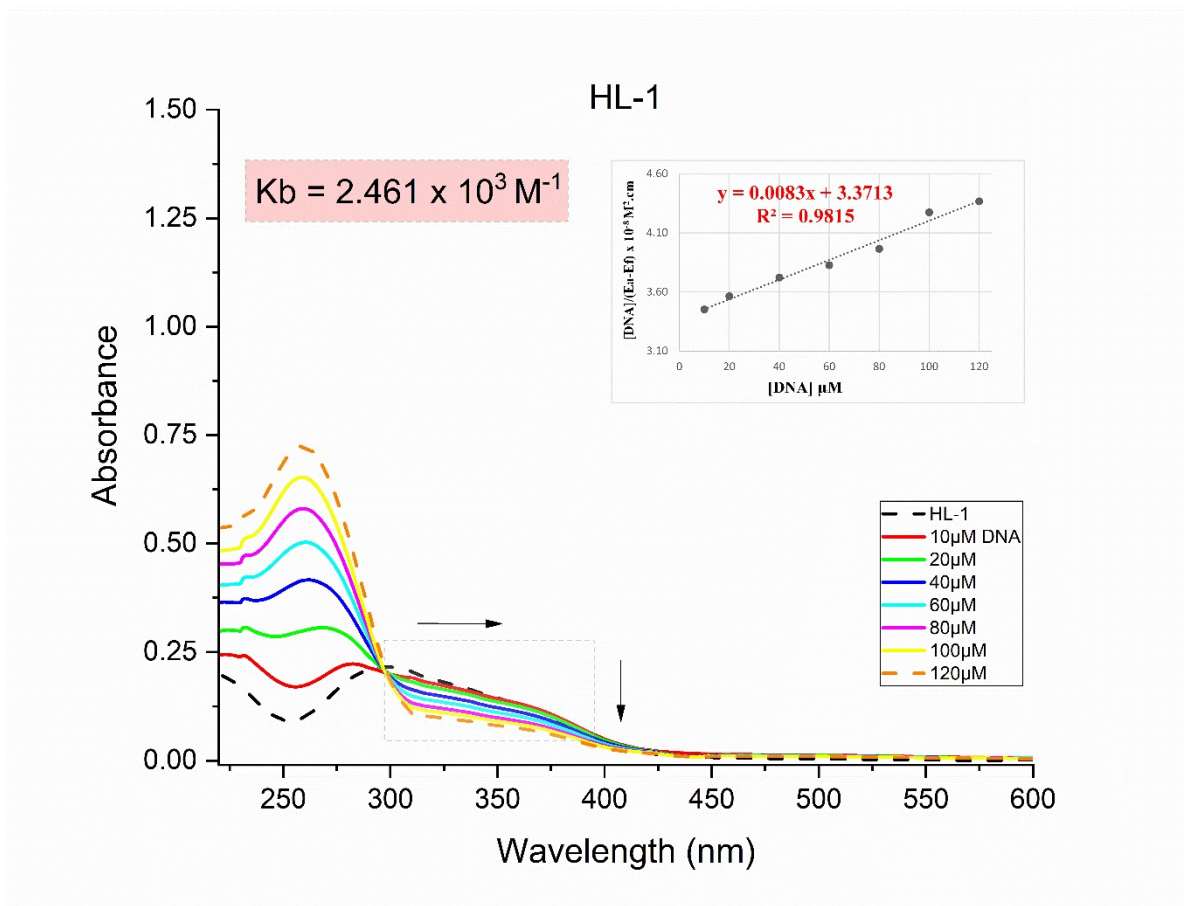

**Figure S30.** Absorption spectra of **HL1** at 30 μM in Tris-HCl buffer (pH 7.4) in the presence of ct-DNA in different concentrations. ct-DNA = 0, 10, 20, 40, 60, 80, 100 and 120 μM.  $\lambda$  (Kb) = 327 nm.

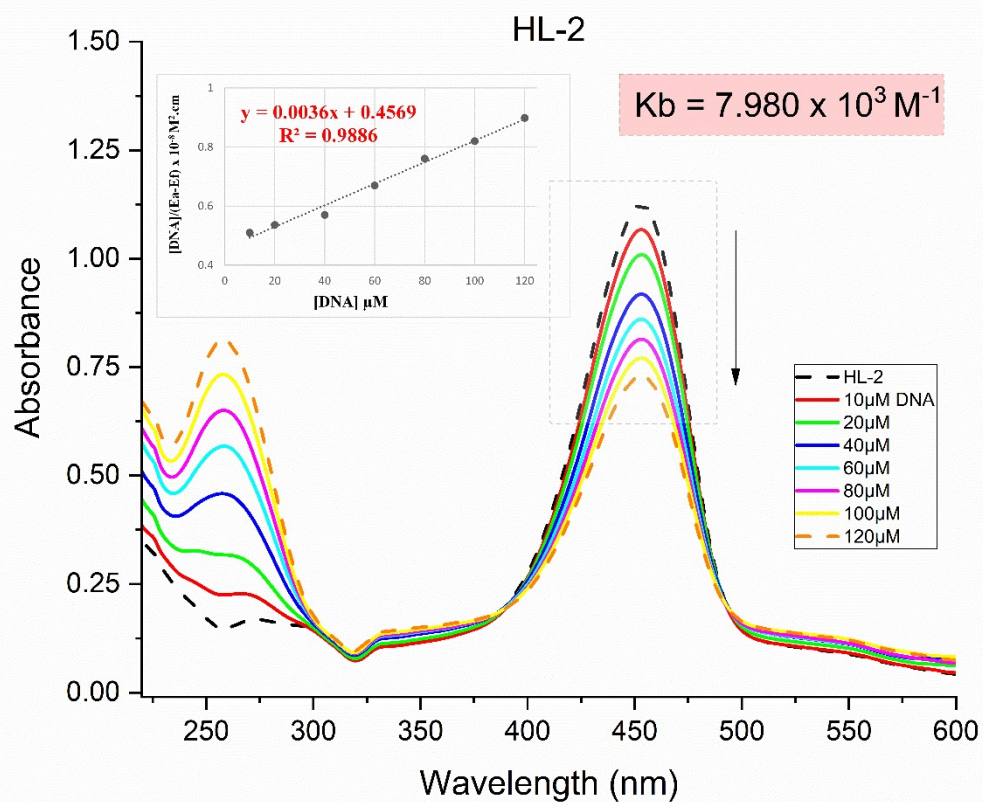

**Figure S31.** Absorption spectra of **HL2** at 30  $\mu\text{M}$  in Tris-HCl buffer (pH 7.4) in the presence of ct-DNA in different concentrations. ct-DNA = 0, 10, 20, 40, 60, 80, 100 and 120  $\mu\text{M}$ .  $\lambda$  ( $K_b$ ) = 453 nm.

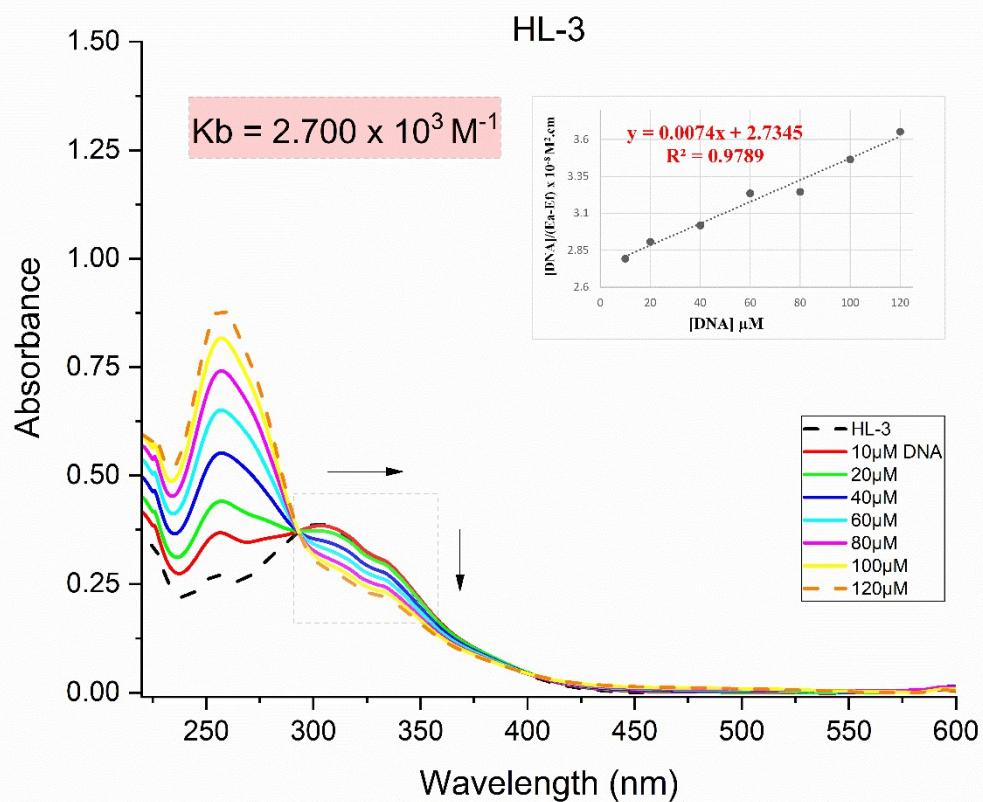

**Figure S32.** Absorption spectra of **HL3** at 30  $\mu\text{M}$  in Tris-HCl buffer (pH 7.4) in the presence of ct-DNA in different concentrations. ct-DNA = 0, 10, 20, 40, 60, 80, 100 and 120  $\mu\text{M}$ .  $\lambda$  (Kb) = 303 nm.

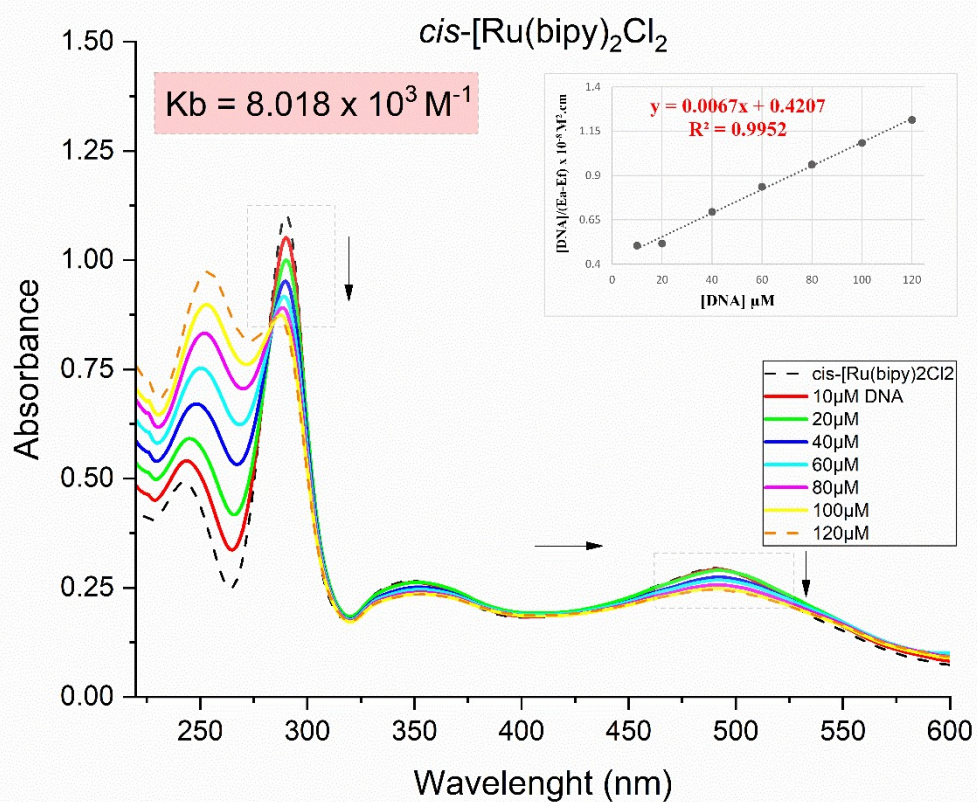

**Figure S33.** Absorption spectra of *cis*-[Ru(bipy)<sub>2</sub>Cl<sub>2</sub>] at 30 μM in Tris-HCl buffer (pH 7.4) in the presence of ct-DNA in different concentrations. ct-DNA = 0, 10, 20, 40, 60, 80, 100 and 120 μM.  $\lambda$  (Kb) = 490 nm.

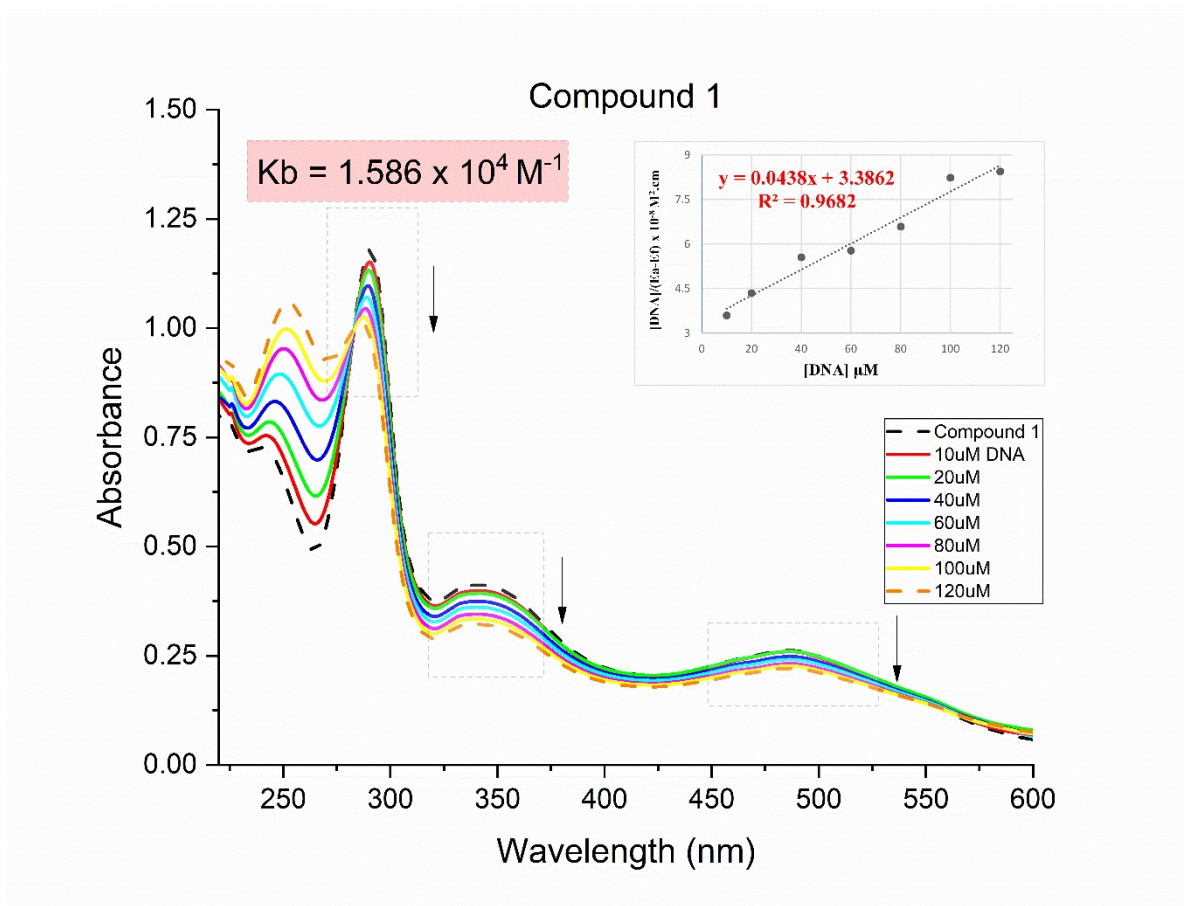

**Figure S34.** Absorption spectra of complex **1** at 30  $\mu\text{M}$  in Tris-HCl buffer (pH 7.4) in the presence of ct-DNA in different concentrations. CtDNA = 0, 10, 20, 40, 60, 80, 100 and 120  $\mu\text{M}$ .  $\lambda$  (Kb) = 487 nm.

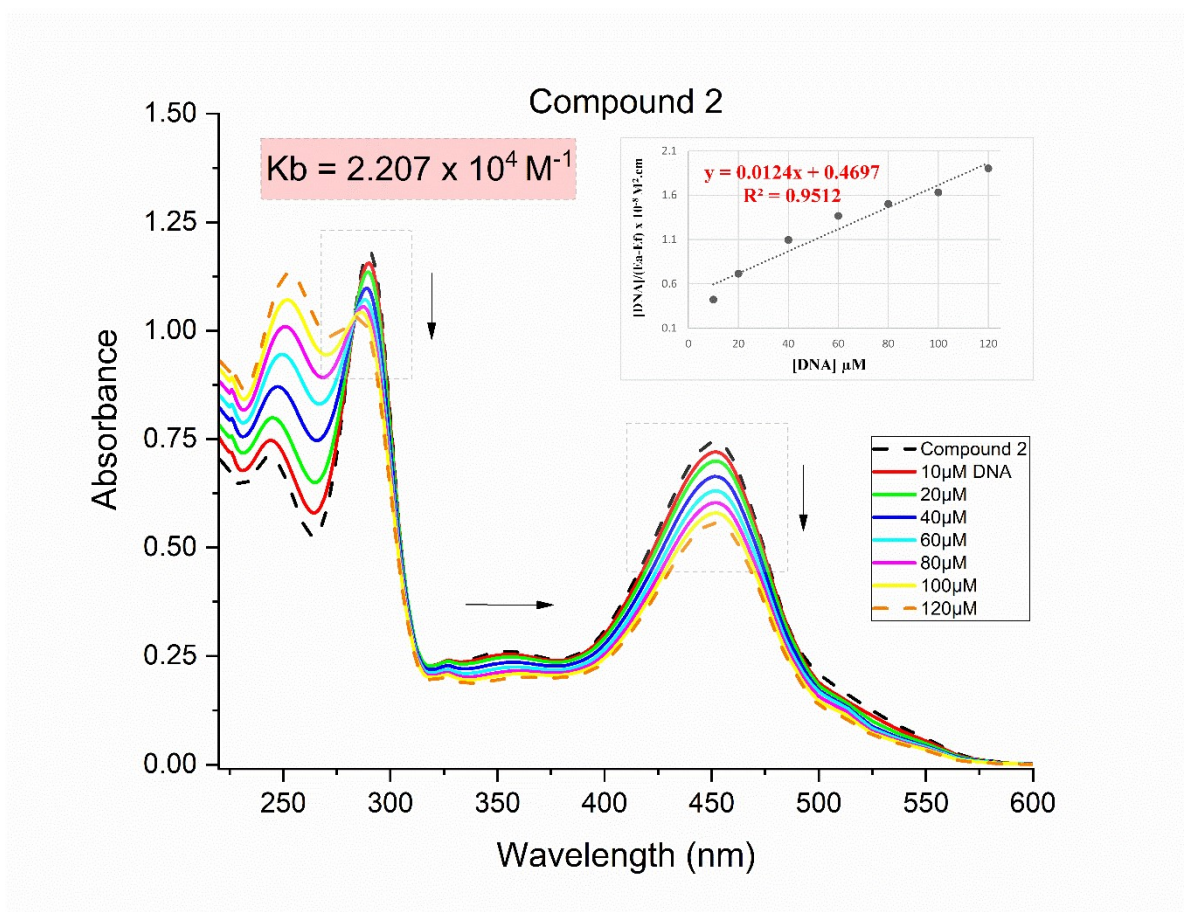

**Figure S35.** Absorption spectra of complex **2** at 30  $\mu\text{M}$  in Tris-HCl buffer (pH 7.4) in the presence of ct-DNA in different concentrations. CtDNA = 0, 10, 20, 40, 60, 80, 100 and 120  $\mu\text{M}$ .  $\lambda$  (Kb) = 450 nm.

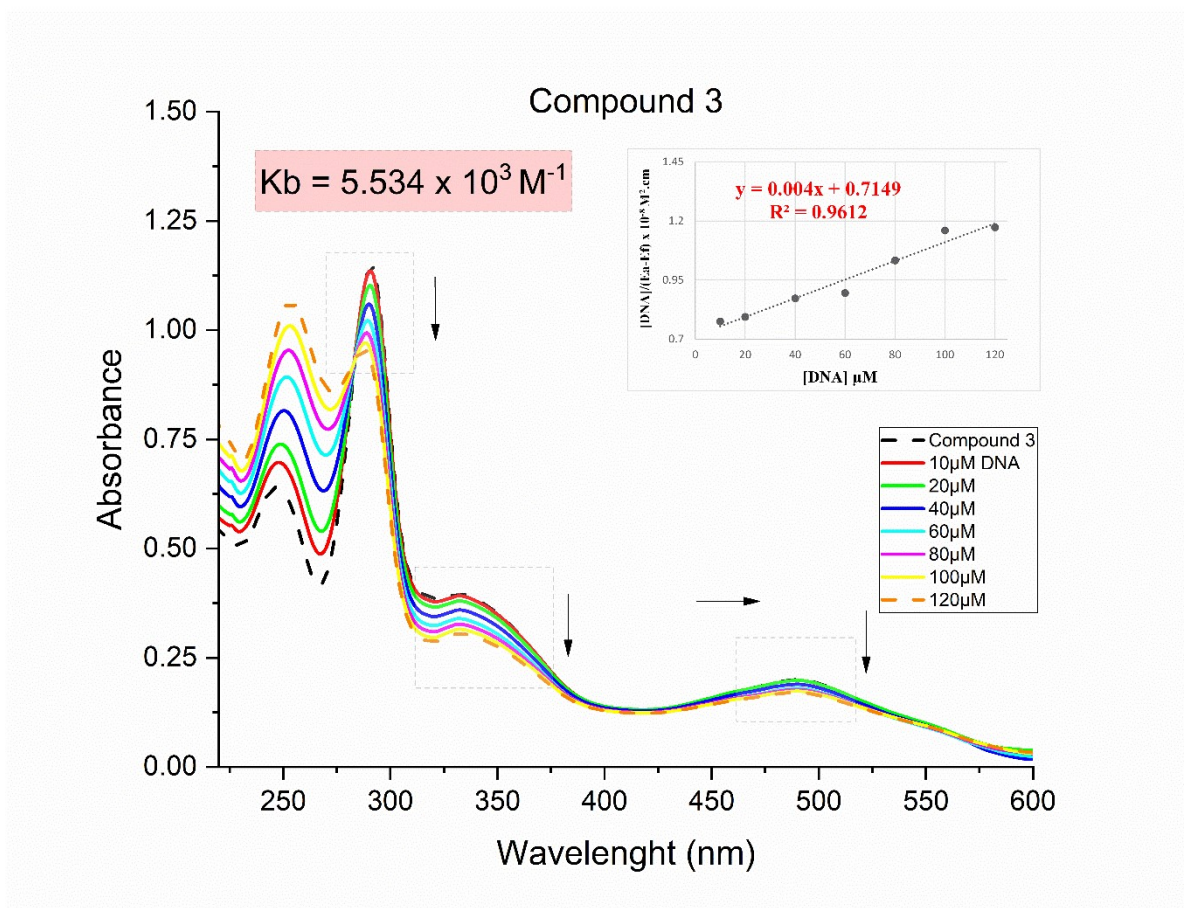

**Figure S36.** Absorption spectra of complex **3** at 30  $\mu\text{M}$  in Tris-HCl buffer (pH 7.4) in the presence of ct-DNA in different concentrations. CtDNA = 0, 10, 20, 40, 60, 80, 100 and 120  $\mu\text{M}$ .  $\lambda$  (Kb) = 490 nm.



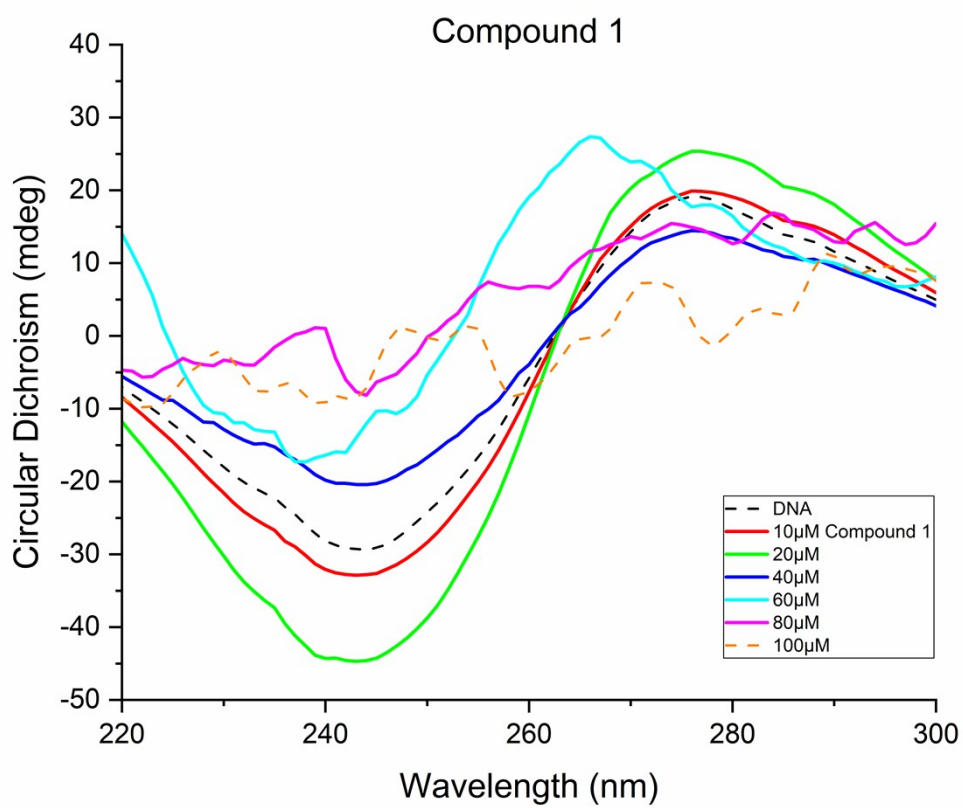

**Figure S37.** Circular dichroism of DNA at a concentration of 300  $\mu\text{M}$  in Tris-HCl buffer (pH 7.4), in the presence of increasing concentrations of complex **1** (10, 20, 40, 60, 80 and 100  $\mu\text{M}$ ).

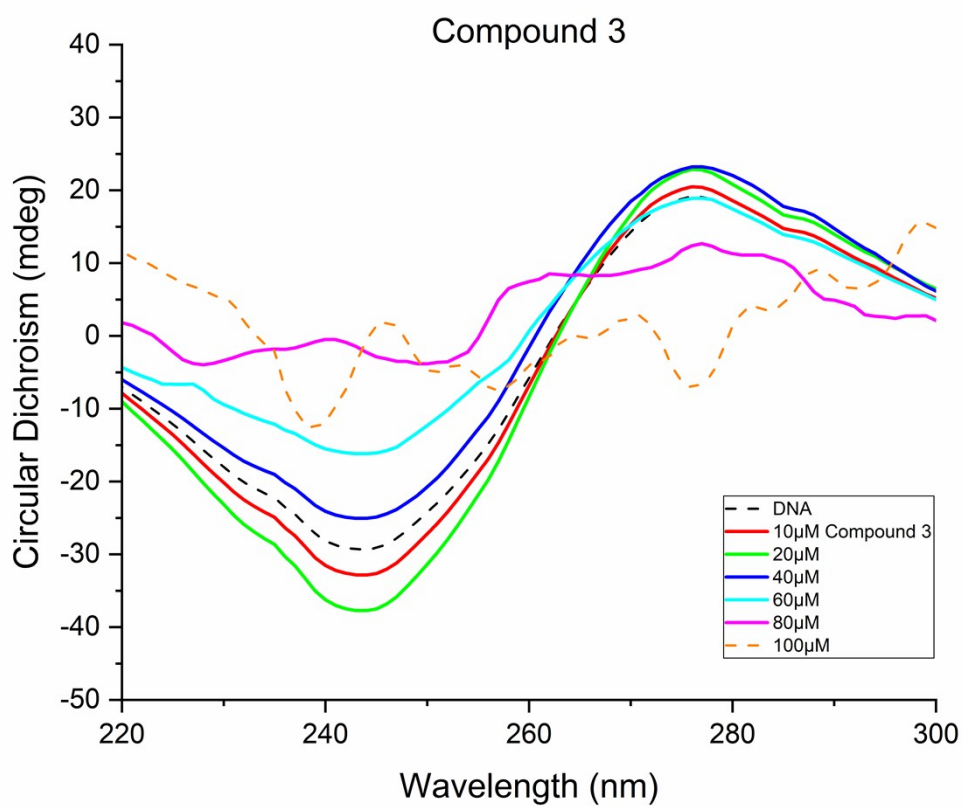

**Figure S38.** Circular dichroism of DNA at a concentration of 300  $\mu\text{M}$  in Tris-HCl buffer (pH 7.4), in the presence of increasing concentrations of complex **3** (10, 20, 40, 60, 80 and 100  $\mu\text{M}$ ).

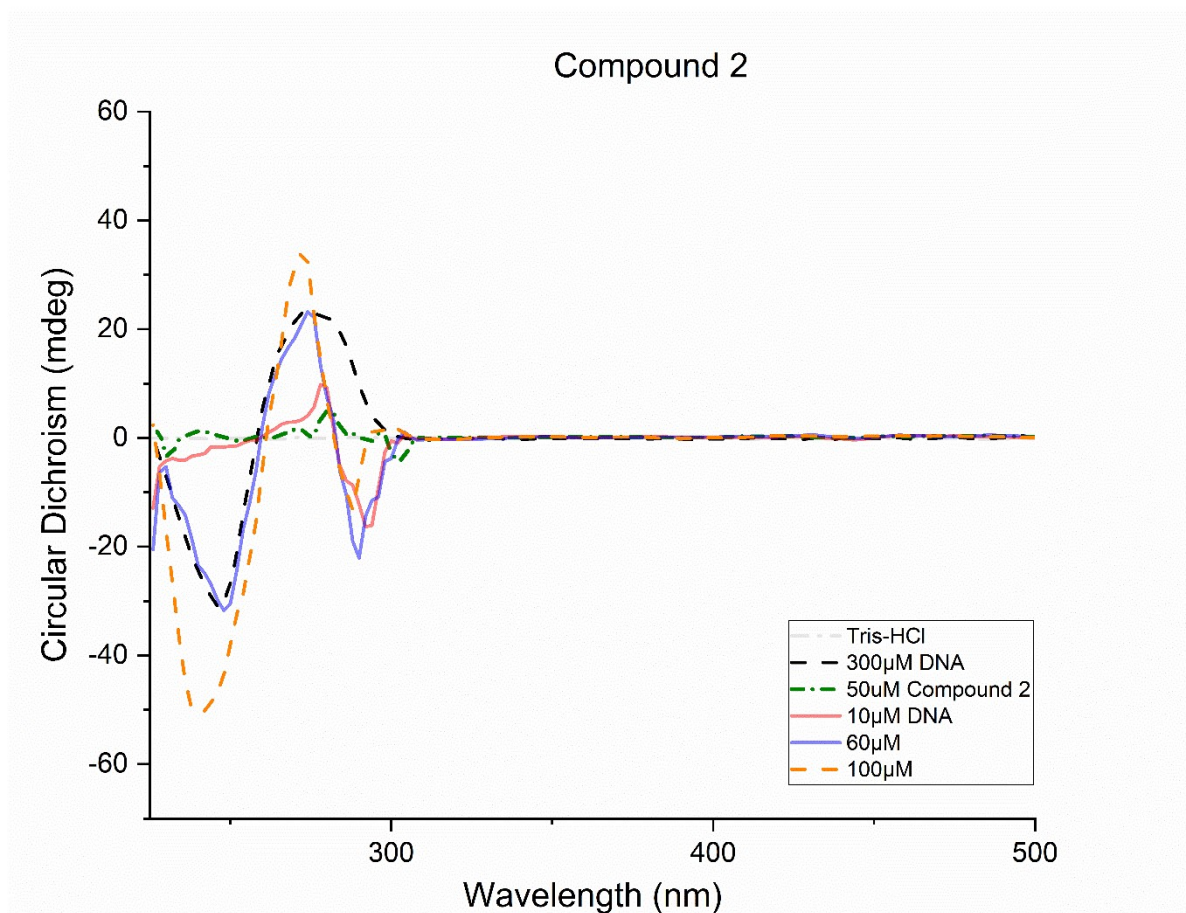

**Figure S39.** Circular dichroism spectra of the ct-DNA at different concentrations ( $[DNA] = 10, 60$  and  $100 \mu M$ ) in the presence of compound **2** at  $50 \mu M$  in Tris-HCl buffer (pH 7.4).

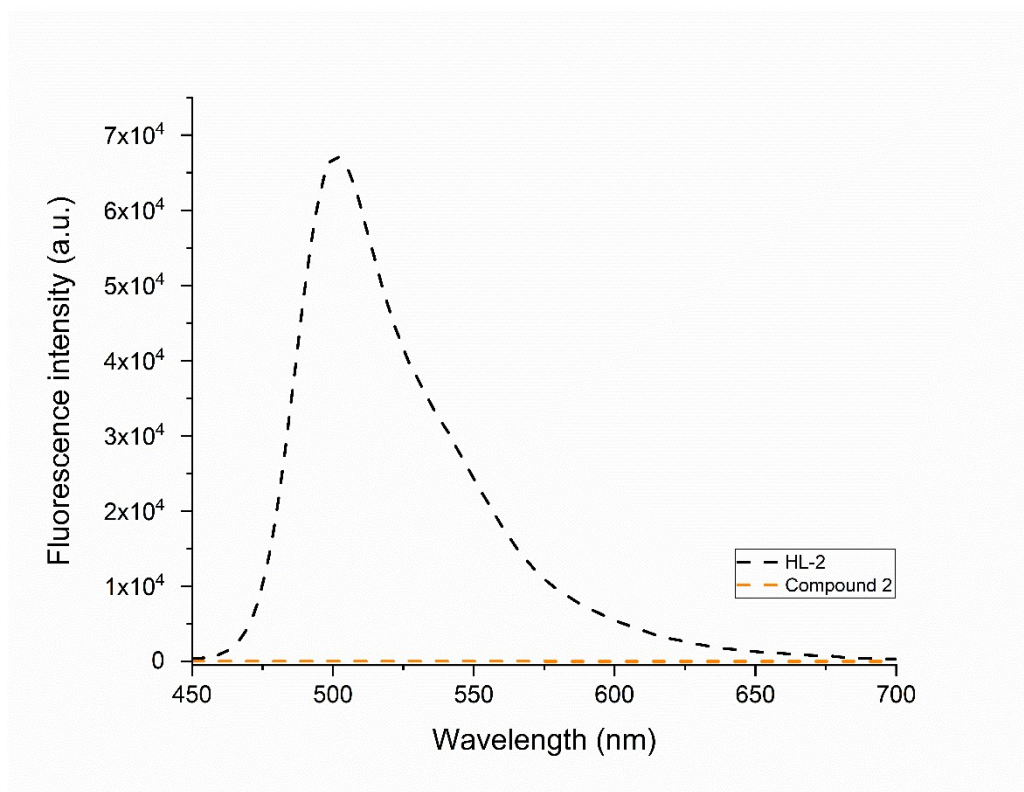

**Figure S40.** Fluorescence emission spectra of **HL2** and **2**, obtained at 50  $\mu$ M ( $\lambda_{ex}$  = 440 nm) in Tris-HCl buffer (pH 7.4) and recorded in an Edinburgh FLS980 spectrofluorometer.

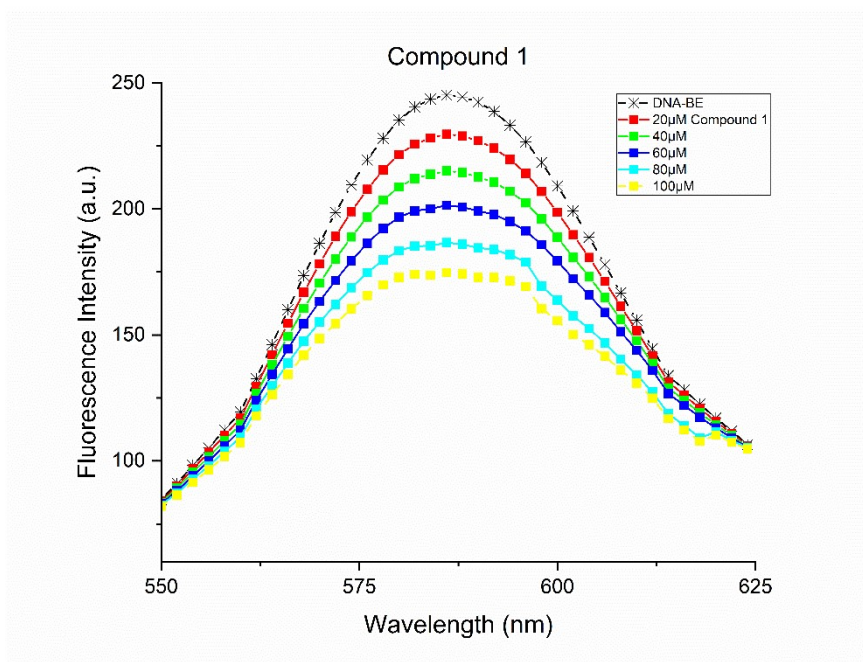

**Figure S41.** Emission quenching curves of EtdBr-DNA by complex 1 ( $[\text{EtBr}] = 10 \mu\text{M}$ ,  $[\text{DNA}] = 100 \mu\text{M}$ ,  $[\text{Complex}] = 0\text{--}100 \mu\text{M}$ ).

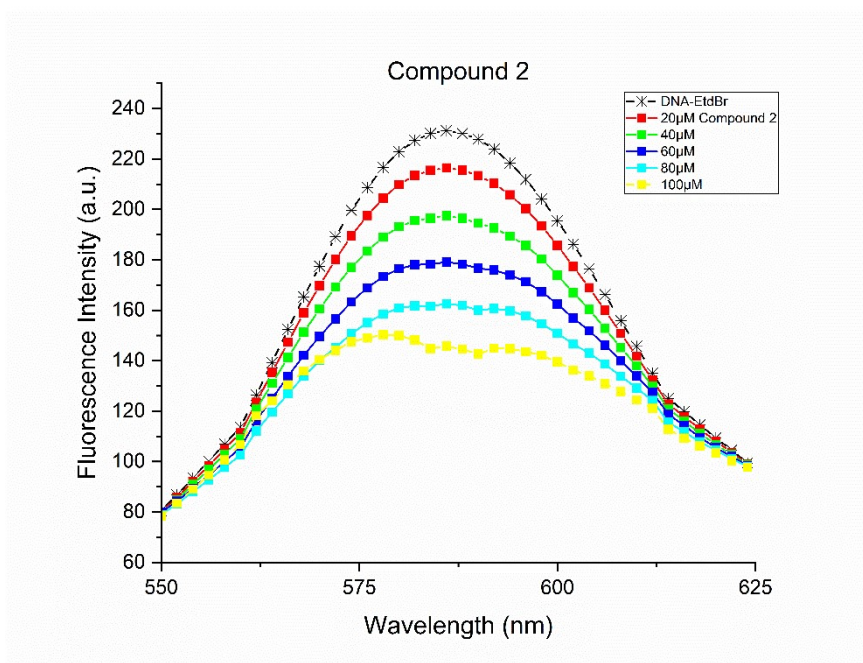

**Figure S42.** Emission quenching curves of EtdBr-DNA by complex 2 ( $[\text{EtBr}] = 10 \mu\text{M}$ ,  $[\text{DNA}] = 100 \mu\text{M}$ ,  $[\text{Complex}] = 0\text{--}100 \mu\text{M}$ ).

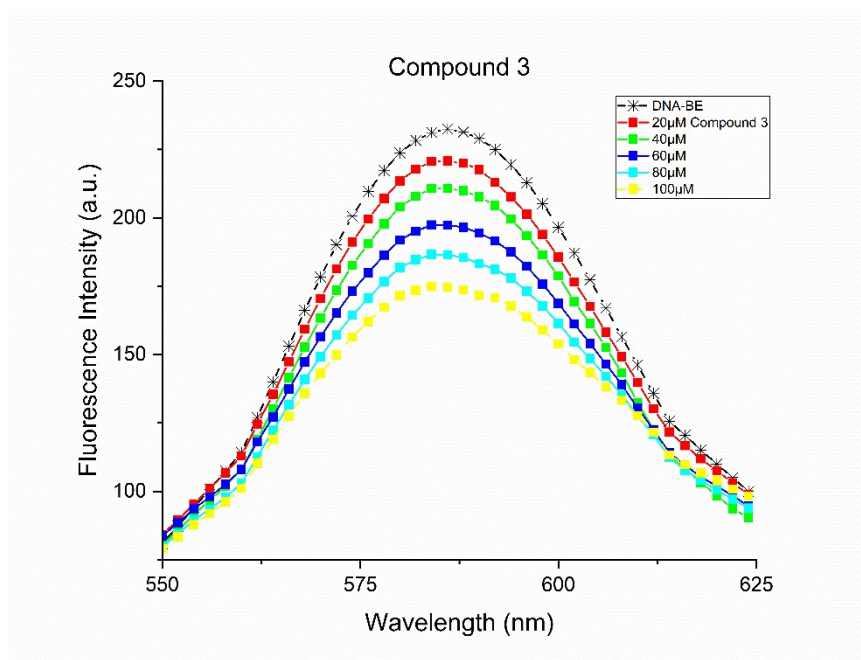

**Figure S43.** Emission quenching curves of EtdBr-DNA by complex **3** ([EtBr] = 10  $\mu\text{M}$ , [DNA] = 100  $\mu\text{M}$ , [Complex] = 0–100  $\mu\text{M}$ ).

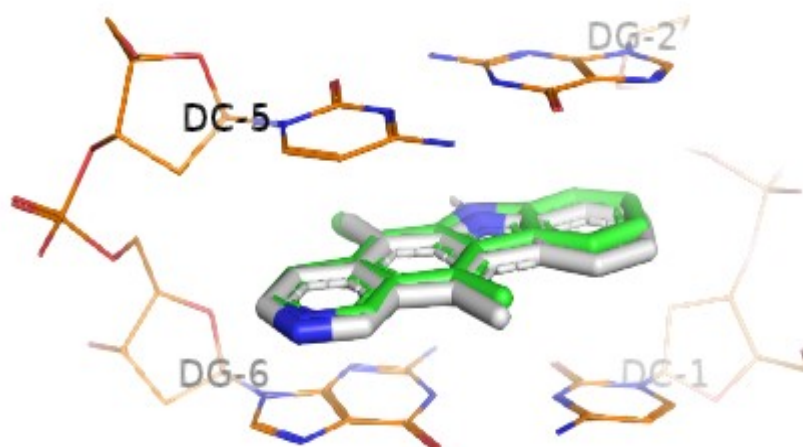

**Figure S44.** Redocking for target 1Z3F, available in PDB, Structure of ellipticine in complex with a 6-bp DNA, RMSD = 0.45.

**Table S3:** Molecular docking results for 1Z3F (PDB).

| COMPOUNDS          | SCORE                    |
|--------------------|--------------------------|
| 1                  | 67.28                    |
| 2                  | 68.62                    |
| 3                  | 64.88                    |
| <b>Ellipticine</b> | <b>75.45 (RMSD 0.45)</b> |
